# Supplementary material for: Switchable hydroxysulfonyloxylation and defluorination–decarboxylation sulfonylation of gem-difluoroalkenes with sodium sulfinate via aerobic oxidation
Source: Royal Society of Chemistry journal article supplement (doi:10.1039/d1qo01005k), 2021-01-01
Supplement: d1qo01005k1.pdf [file d1qo01005k1.pdf]

Supporting Information for

**Switchable Hydroxysulfonyloxylation and Defluorination-Decarboxylation Sulfonylation  
of *gem*-Difluoroalkenes with Sodium Sulfinate *via* Aerobic Oxidation**

Xiang Liu,\* Jiatong Lin, Canzhan Zhuang, Jinling Zhong, Dan Song, Jiaji Zhao, Hua Cao\*

*School of Chemistry and Chemical Engineering and Guangdong Cosmetics Engineering & Technology Research  
Center, Guangdong Pharmaceutical University, Zhongshan 528458, P. R. of China*

E-mail: liux96@gdpu.edu.cn; caohua@gdpu.edu.cn

**Table of Contents:**

---

|                                                      |     |
|------------------------------------------------------|-----|
| 1. General considerations                            | S2  |
| 2. Condition optimization for synthesis of 5a        | S3  |
| 3. Experimental procedures and characterization data | S4  |
| 2.1 <i>Experimental procedures</i>                   | S4  |
| 2.2 <i>Characterization data</i>                     | S4  |
| 4. NMR spectra for new compounds                     | S14 |
| 5. X-ray crystallographic data                       | S43 |
| 6. References                                        | S46 |

---

## 1. General considerations

Unless otherwise noted, commercial reagents were purchased from Adamas, Alfa, Aladdin, TCI, *J&K* or Macklin and used without further purification. All reactions were carried out using oven-dried glassware and all reactions proceeded without special care. Column chromatography was performed on 200-300 mesh silica gel (Huanghai, China).

$^1\text{H}$ ,  $^{19}\text{F}$  and  $^{13}\text{C}\{^1\text{H}\}$  NMR spectra were recorded on an Bruker Ascend 400 MHz spectrometer at ambient temperature.  $^1\text{H}$  NMR spectra are referred to the TMS signal ( $\delta = 0$  ppm) and  $^{13}\text{C}$  NMR spectra are referred to the residual solvent signal ( $\delta = 77.16$  ppm). Data for  $^1\text{H}$  NMR are reported as follows: chemical shifts ( $\delta$  ppm), multiplicities (s = singlet, d = doublet, t = triplet, q = quartet, m = multiplet, br = broad), coupling constants (Hz), integration.

The data of HRMS was carried out on a waters G2-XS high-resolution mass spectrometer (HR-ESI-MS) or Thermo Fisher Scientific LTQ FTICR-MS. Melting point were recorded using a SGW X-4 Melting Point Apparatus.

*gem*-Difluoroalkene substrates **1** are known and their spectral data are in accordance with the reported in the literature.<sup>1-6</sup>

## 2. Condition optimization for synthesis of 5a

Table S1. Optimization of reaction condition for synthesis of 5a<sup>a</sup>

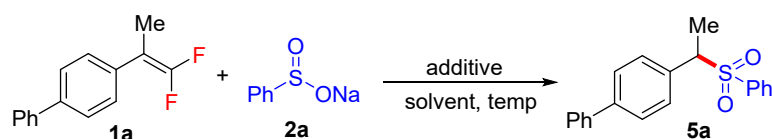

| entry                   | additive                          | solvent                         | temp      | yield     |
|-------------------------|-----------------------------------|---------------------------------|-----------|-----------|
| 1                       | --                                | THF                             | 60        | trace     |
| 2                       | CsF                               | THF                             | 60        | n. d.     |
| 3                       | pyridine·HF                       | THF                             | 60        | trace     |
| 4                       | TBAF                              | THF                             | 60        | 15        |
| 5                       | BF <sub>3</sub> ·OEt <sub>2</sub> | THF                             | 60        | n. d.     |
| 6                       | KF                                | THF                             | 60        | 42        |
| 7                       | Et <sub>3</sub> N·3HF             | THF                             | 60        | 54        |
| 8                       | Et <sub>3</sub> N·3HF             | 1,4-dioxane                     | 60        | 23        |
| 6                       | Et <sub>3</sub> N·3HF             | DMF                             | 60        | trace     |
| 7                       | Et <sub>3</sub> N·3HF             | CH <sub>2</sub> Cl <sub>2</sub> | 60        | n. d.     |
| 8                       | Et <sub>3</sub> N·3HF             | DCE                             | 60        | n. d.     |
| 9 <sup>b</sup>          | Et <sub>3</sub> N·3HF             | THF                             | 60        | 56        |
| <b>10<sup>b,c</sup></b> | <b>Et<sub>3</sub>N·3HF</b>        | <b>THF</b>                      | <b>60</b> | <b>58</b> |
| 11 <sup>b,c</sup>       | Et <sub>3</sub> N·3HF             | THF                             | 40        | 45        |
| 12 <sup>b,c</sup>       | Et <sub>3</sub> N·3HF             | THF                             | 80        | 26        |
| 13 <sup>b,c,d</sup>     | Et <sub>3</sub> N·3HF             | THF                             | 60        | trace     |

<sup>a</sup> Reaction condition: **1a** (0.2 mmol), **2a** (0.4 mmol, 2.0 equiv), additive (0.2 mmol, 2.0 equiv), solvent (2 mL), O<sub>2</sub> atmosphere, 12 h. Isolated yields. <sup>b</sup> Et<sub>3</sub>N·3HF (3.0 equiv). <sup>c</sup> **2a** (3.0 equiv). <sup>d</sup> N<sub>2</sub> atmosphere.

### 3. Experimental procedures and characterization data

#### Synthesis of product 3 according to the following procedure:

As exemplified for **3a**:

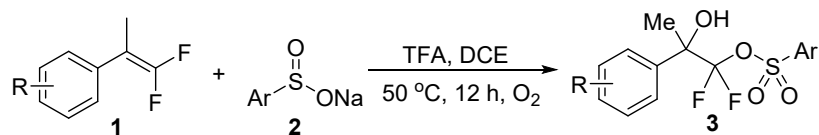

A pressure tube was charged with 4-(1,1-difluoroprop-1-en-2-yl)-1,1'-biphenyl **1a** (46.1 mg, 0.2 mmol), sodium sulfinate **2a** (0.734 mg, 0.4 mmol) and DCE (2 mL). TFA (22.8 mg, 0.2 mmol) was added and the mixtures were heated with a heating mantle at 50 °C under O<sub>2</sub> atmosphere for 12 h. After cooling to room temperature, the solvent was volatilized and the crude product was purified by flash column chromatography on silica gel (eluent: PE/EA = 6/1, v/v), and the target compound **3a** was obtained.

#### Synthesis of product 5 according to the following procedure:

As exemplified for **5a**:

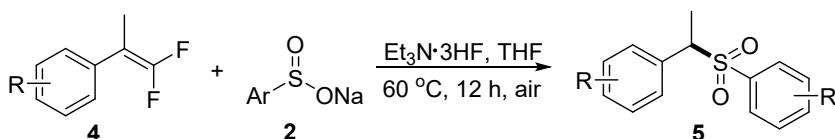

A pressure tube was charged with 4-(1,1-difluoroprop-1-en-2-yl)-1,1'-biphenyl **1a** (46.1 mg, 0.2 mmol), sodium sulfinate **2a** (98.3 mg, 0.6 mmol) and THF (2 mL). Et<sub>3</sub>N·3HF (96.7 mg, 0.6 mmol) was added and the mixtures were heated with a heating mantle at 60 °C under O<sub>2</sub> atmosphere for 12 h. After cooling to room temperature, the solvent was volatilized and the crude product was purified by preparative TLC (eluent: PE/EA = 6/1, v/v), and the target compound **5a** was obtained. In some cases, twice purifications are needed.

### 2.2 Characterization data

#### 2-([1,1'-Biphenyl]-4-yl)-1,1-difluoro-2-hydroxypropyl benzenesulfonate (**3a**)

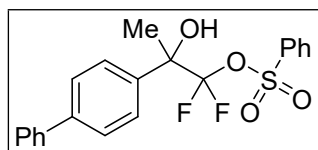

Flash column chromatography on silica gel (eluent: PE/EA = 6/1, v/v) to afford **3a**. Yellow solid (63.0 mg, 78%), mp 98.8-99.0 °C. <sup>1</sup>H NMR (400 MHz, CDCl<sub>3</sub>) δ 7.79 – 7.74 (m, 2H), 7.59 – 7.55 (m, 3H), 7.47 (d, *J* = 14.5 Hz, 6H), 7.43 (d, *J* = 4.4 Hz, 1H), 7.41 – 7.37 (m, 2H), 2.26 (s, 1H), 1.73 (s, 3H). <sup>13</sup>C NMR (100 MHz, CDCl<sub>3</sub>) δ 141.28, 140.44, 137.30, 136.82, 134.49, 129.22, 128.99, 128.00, 127.71, 127.17,

126.84, 126.81, 123.39 (t,  $J = 285.0$  Hz), 76.07 (t,  $J = 27.0$  Hz), 23.67.  $^{19}\text{F}$  NMR (377 MHz,  $\text{CDCl}_3$ )  $\delta$  -82.31, -82.42. HR-DART-MS (m/z): calcd for  $\text{C}_{21}\text{H}_{22}\text{NF}_2\text{O}_4\text{S}$  [ $\text{M} + \text{NH}_4$ ] $^+$ : 422.1232, found: 422.1231.

### 1,1-Difluoro-2-hydroxy-2-(4-methoxyphenyl)propyl benzenesulfonate (3b)

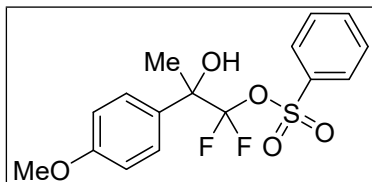

Flash column chromatography on silica gel (eluent: PE/EA = 6/1, v/v) to afford **3b**. Light yellow oil (45.1 mg, 63%).  $^1\text{H}$  NMR (400 MHz,  $\text{CDCl}_3$ )  $\delta$  7.79 (d,  $J = 8.0$  Hz, 2H), 7.67 – 7.61 (m, 1H), 7.47 (t,  $J = 7.8$  Hz, 2H), 7.35 (d,  $J = 8.6$  Hz, 2H), 6.80 (d,  $J = 8.7$  Hz, 2H), 3.80 (s, 3H), 2.38 (s,

1H), 1.68 (s, 3H).  $^{13}\text{C}$  NMR (100 MHz,  $\text{CDCl}_3$ )  $\delta$  159.40, 139.95, 136.84, 134.51, 129.25, 129.19, 128.03, 123.38 (t,  $J = 285.0$  Hz), 118.60, 113.88, 112.33, 76.08 (t,  $J = 27.0$  Hz), 55.35, 23.81.  $^{19}\text{F}$  NMR (377 MHz,  $\text{CDCl}_3$ )  $\delta$  -82.56, -82.69. HR-GC-MS (m/z): calcd for  $\text{C}_{16}\text{H}_{16}\text{F}_2\text{O}_5\text{S}$  [ $\text{M}$ ]: 358.0687, found: 358.0690.

### 1,1-Difluoro-2-hydroxy-2-(3-methoxyphenyl)propyl benzenesulfonate (3c)

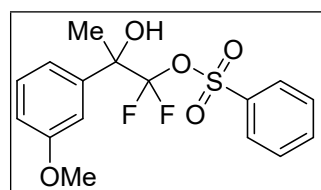

Flash column chromatography on silica gel (eluent: PE/EA = 6/1, v/v) to afford **3c**. Yellow oil (46.5 mg, 65%).  $^1\text{H}$  NMR (400 MHz,  $\text{CDCl}_3$ )  $\delta$  7.80 – 7.76 (m, 2H), 7.66 – 7.60 (m, 1H), 7.46 (t,  $J = 7.8$  Hz, 2H), 7.23 – 7.16 (m, 1H), 7.00 (dd,  $J = 7.4, 1.9$  Hz, 2H), 6.85 – 6.81 (m, 1H), 3.75 (s, 3H), 1.68 (s,

3H).  $^{13}\text{C}$  NMR (100 MHz,  $\text{CDCl}_3$ )  $\delta$  159.40, 139.95, 136.84, 134.51, 129.25, 129.19, 128.03, 123.38 (t,  $J = 285.0$  Hz), 118.60, 113.88, 112.33, 76.08 (t,  $J = 27.0$  Hz), 55.35, 23.81.  $^{19}\text{F}$  NMR (377 MHz,  $\text{CDCl}_3$ )  $\delta$  -82.12, -82.18. HR-GC-MS (m/z): calcd for  $\text{C}_{16}\text{H}_{16}\text{F}_2\text{O}_5\text{S}$  [ $\text{M}$ ]: 358.0687, found: 358.0687.

### 1,1-Difluoro-2-hydroxy-2-(2-methoxyphenyl)propyl benzenesulfonate (3d)

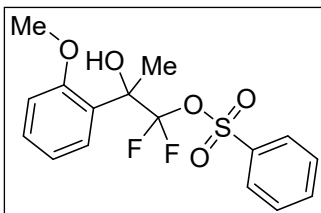

Flash column chromatography on silica gel (eluent: PE/EA = 6/1, v/v) to afford **3d**. Colorless oil (42.9 mg, 60%).  $^1\text{H}$  NMR (400 MHz,  $\text{CDCl}_3$ )  $\delta$  7.78 – 7.73 (m, 2H), 7.62 (t,  $J = 7.5$  Hz, 1H), 7.45 (t,  $J = 7.9$  Hz, 2H), 7.33 – 7.28 (m, 1H), 7.23 (dd,  $J = 7.9, 1.5$  Hz, 1H), 6.97 (td,  $J = 7.6, 1.1$  Hz, 1H), 6.88 (d,  $J =$

8.3 Hz, 1H), 6.08 (s, 1H), 3.81 (s, 3H), 1.67 (s, 3H).  $^{13}\text{C}$  NMR (100 MHz,  $\text{CDCl}_3$ )  $\delta$  58.20, 137.28, 134.24, 130.28, 129.90, 129.15, 127.93, 125.83, 123.90 (t,  $J = 285.0$  Hz), 121.60, 112.66, 77.96 (t,  $J = 27.0$  Hz), 56.41, 22.47.  $^{19}\text{F}$  NMR (377 MHz,  $\text{CDCl}_3$ )  $\delta$  -82.18, -83.88. HR-DART-MS (m/z): calcd for  $\text{C}_{16}\text{H}_{17}\text{F}_2\text{O}_5\text{S}$  [ $\text{M} + \text{H}$ ] $^+$ : 359.0759, found: 359.0761.

### 1,1-Difluoro-2-hydroxy-2-(naphthalen-2-yl)propyl benzenesulfonate (3e)

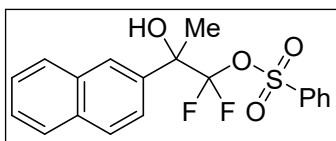

Flash column chromatography on silica gel (eluent: PE/EA = 6/1, v/v) to afford **3e**. Yellow oil (52.9 mg, 70%). <sup>1</sup>H NMR (400 MHz, CDCl<sub>3</sub>) δ 7.87 (s, 1H), 7.81 – 7.77 (m, 1H), 7.76 – 7.73 (m, 1H), 7.69 (d, *J* = 8.7 Hz, 1H), 7.62 (d, *J* = 7.7 Hz, 2H), 7.53 – 7.46 (m, 3H), 7.41 (t, *J* = 7.5 Hz, 1H), 7.18 (t, 2H), 2.53 (s, 1H), 1.78 (s, 3H). <sup>13</sup>C NMR (100 MHz, CDCl<sub>3</sub>) δ 136.50, 135.71, 134.32, 133.02, 132.74, 128.97, 128.87, 128.54, 127.81, 127.49, 126.69, 126.33, 126.26, 125.91, 123.85, 123.42 (t, *J* = 285.0 Hz), 120.57, 76.26 (t, *J* = 27.0 Hz), 23.67. <sup>19</sup>F NMR (377 MHz, CDCl<sub>3</sub>) δ -82.09, -82.21. HR-GC-MS (*m/z*): calcd for C<sub>19</sub>H<sub>16</sub>F<sub>2</sub>O<sub>4</sub>S [M]: 378.0737, found: 378.0739.

### 2-([1,1'-Biphenyl]-4-yl)-1,1-difluoro-2-hydroxypropyl 4-methylbenzenesulfonate (3f)

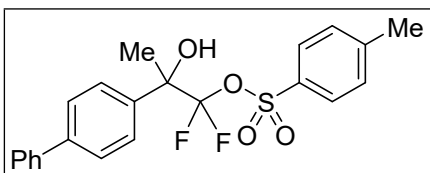

Flash column chromatography on silica gel (eluent: PE/EA = 6/1, v/v) to afford **3f**. Yellow solid (60.3 mg, 72%), mp 88.8-89.9 °C. <sup>1</sup>H NMR (400 MHz, CDCl<sub>3</sub>) δ 7.66 (d, *J* = 8.1 Hz, 2H), 7.59 – 7.55 (m, 2H), 7.49 (s, 4H), 7.45 (t, *J* = 7.7 Hz, 2H), 7.39 – 7.34 (m, 1H), 7.20 (d, *J* = 8.1 Hz, 2H), 2.56 (s, 1H), 2.34 (s, 3H), 1.73 (s, 3H). <sup>13</sup>C NMR (100 MHz, CDCl<sub>3</sub>) δ 145.82, 141.21, 140.44, 137.34, 133.80, 129.84, 128.98, 128.11, 127.71, 127.15, 126.84, 126.74, 123.32 (t, *J* = 285.0 Hz), 76.10 (t, *J* = 27.0 Hz), 23.73, 21.76. <sup>19</sup>F NMR (377 MHz, CDCl<sub>3</sub>) δ -82.47, -82.57. HR-GC-MS (*m/z*): calcd for C<sub>22</sub>H<sub>20</sub>F<sub>2</sub>O<sub>4</sub>S [M]: 418.1050, found: 418.1055.

### 2-([1,1'-Biphenyl]-4-yl)-1,1-difluoro-2-hydroxypropyl 3,4-dimethylbenzenesulfonate (3g)

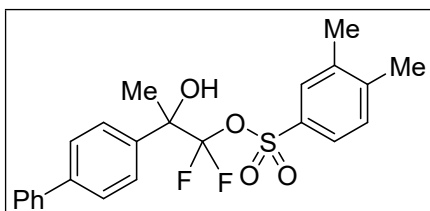

Flash column chromatography on silica gel (eluent: PE/EA = 6/1, v/v) to afford **3g**. Light yellow oil (58.7 mg, 68%). <sup>1</sup>H NMR (400 MHz, CDCl<sub>3</sub>) δ 7.58 – 7.53 (m, 4H), 7.51 (s, 4H), 7.45 (t, *J* = 7.6 Hz, 2H), 7.36 (t, *J* = 7.2 Hz, 1H), 7.16 (d, *J* = 7.9 Hz, 1H), 2.62 (s, 1H), 2.24 (s, 3H), 2.20 (s, 3H), 1.73 (s, 3H). <sup>13</sup>C NMR (100 MHz, CDCl<sub>3</sub>) δ 144.59, 141.11, 140.38, 138.15, 137.41, 133.87, 130.30, 128.96, 128.71, 127.69, 127.12, 126.86, 126.67, 125.63, 123.33 (t, *J* = 285.0 Hz), 76.09 (t, *J* = 27.0 Hz), 23.78, 20.17, 19.86. <sup>19</sup>F NMR (377 MHz, CDCl<sub>3</sub>) δ -82.41, -82.53. HR-GC-MS (*m/z*): calcd for C<sub>23</sub>H<sub>22</sub>F<sub>2</sub>O<sub>4</sub>S [M]: 432.1207, found: 432.1214.

### 2-([1,1'-Biphenyl]-4-yl)-1,1-difluoro-2-hydroxypropyl 4-(tert-butyl)benzenesulfonate (**3h**)

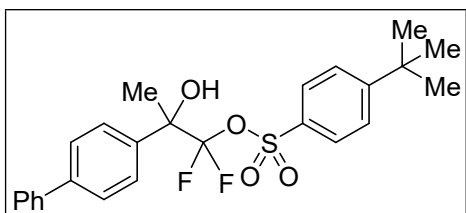

Flash column chromatography on silica gel (eluent: PE/EA = 6/1, v/v) to afford **3h**. Colorless oil (59.8 mg, 65%). <sup>1</sup>H NMR (400 MHz, CDCl<sub>3</sub>) δ 7.68 (d, *J* = 8.4 Hz, 2H), 7.58 (dd, *J* = 8.2, 1.4 Hz, 2H), 7.51 (s, 4H), 7.47 – 7.38 (m, 5H), 2.50 (s, 1H), 1.75 (s, 3H), 1.24 (s, 9H). <sup>13</sup>C NMR (100 MHz, CDCl<sub>3</sub>) δ 158.71, 141.24, 140.41, 137.37, 133.71, 129.00, 127.92, 127.74, 127.17, 126.85, 126.77, 126.23, 123.34 (t, *J* = 285.0 Hz), 76.14 (t, *J* = 27.0 Hz), 35.40, 30.99, 23.79. <sup>19</sup>F NMR (377 MHz, CDCl<sub>3</sub>) δ -82.51, -82.57. HR-GC-MS (*m/z*): calcd for C<sub>25</sub>H<sub>26</sub>F<sub>2</sub>O<sub>4</sub>S [M]: 460.1520, found: 460.1527.

### 2-([1,1'-Biphenyl]-4-yl)-1,1-difluoro-2-hydroxypropyl [1,1'-biphenyl]-4-sulfonate (**3i**)

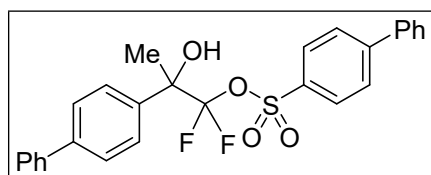

Flash column chromatography on silica gel (eluent: PE/EA = 6/1, v/v) to afford **3i**. Yellow solid (64.3 mg, 67%), mp 188.4-188.9 °C. <sup>1</sup>H NMR (400 MHz, CDCl<sub>3</sub>) δ 7.77 (d, *J* = 8.3 Hz, 2H), 7.56 (d, *J* = 8.5 Hz, 2H), 7.52 – 7.47 (m, 6H), 7.45 – 7.35 (m, 8H), 2.56 (s, 1H), 1.76 (s, 3H). <sup>13</sup>C NMR (100 MHz, CDCl<sub>3</sub>) δ 147.33, 141.25, 140.30, 138.75, 137.31, 135.09, 129.24, 129.01, 128.97, 128.53, 127.72, 127.64, 127.44, 127.16, 126.84, 126.72, 123.30 (t, *J* = 285.0 Hz), 76.12 (t, *J* = 27.0 Hz), 23.63. <sup>19</sup>F NMR (377 MHz, CDCl<sub>3</sub>) δ -82.48, -82.53. HR-GC-MS (*m/z*): calcd for C<sub>27</sub>H<sub>22</sub>F<sub>2</sub>O<sub>4</sub>S [M]: 480.1207, found: 480.1212.

### 2-([1,1'-Biphenyl]-4-yl)-1,1-difluoro-2-hydroxypropyl 4-fluorobenzenesulfonate (**3j**)

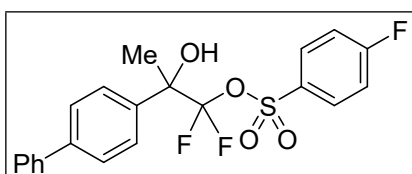

Flash column chromatography on silica gel (eluent: PE/EA = 6/1, v/v) to afford **3j**. Yellow oil (48.9 mg, 58%). <sup>1</sup>H NMR (400 MHz, CDCl<sub>3</sub>) δ 7.80 – 7.75 (m, 2H), 7.59 – 7.56 (m, 2H), 7.53 – 7.44 (m, 6H), 7.40 – 7.35 (m, 1H), 7.08 (t, *J* = 8.5 Hz, 2H), 2.49 (s, 1H), 1.75 (s, 3H). <sup>13</sup>C NMR (100 MHz, CDCl<sub>3</sub>) δ 166.12 (d, *J* = 258.0 Hz), 141.44, 140.31, 137.16, 132.74 (d, *J* = 3.3 Hz), 131.05 (d, *J* = 9.8 Hz), 129.05, 128.99, 127.81, 127.17, 126.83, 123.36 (t, *J* = 285.0 Hz), 116.64 (d, *J* = 23.0 Hz), 76.06 (t, *J* = 27.0 Hz), 23.67. <sup>19</sup>F NMR (377 MHz, CDCl<sub>3</sub>) δ -82.51, -82.62, -101.38. HR-GC-MS (*m/z*): calcd for C<sub>21</sub>H<sub>17</sub>F<sub>3</sub>O<sub>4</sub>S [M]: 422.0800, found: 422.0787.

### 2-([1,1'-Biphenyl]-4-yl)-1,1-difluoro-2-hydroxypropyl 4-chlorobenzenesulfonate (**3k**)

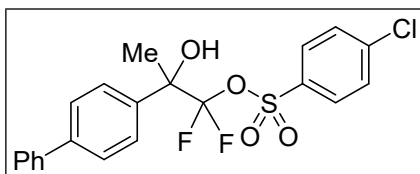

Flash column chromatography on silica gel (eluent: PE/EA = 6/1, v/v)

to afford **3k**. Yellow solid (56.1 mg, 64%), mp 79.0-80.9 °C. <sup>1</sup>H NMR (400 MHz, CDCl<sub>3</sub>) δ 7.67 (d, *J* = 8.4 Hz, 2H), 7.60 – 7.57 (m, 2H),

7.51 – 7.44 (m, 6H), 7.40 – 7.35 (m, 3H), 2.47 (s, 1H), 1.75 (s, 3H). <sup>13</sup>C NMR (100 MHz, CDCl<sub>3</sub>) δ 141.48, 141.32, 140.29, 137.12, 135.21, 129.57, 129.45, 129.05, 127.82, 127.21, 126.83, 126.52, 123.39 (t, *J* = 285.0 Hz), 76.07 (t, *J* = 27.0 Hz), 23.66. <sup>19</sup>F NMR (377 MHz, CDCl<sub>3</sub>) δ -82.38, -82.45. HR-GC-MS (*m/z*): calcd for C<sub>21</sub>H<sub>17</sub>ClF<sub>2</sub>O<sub>4</sub>S [M]: 438.0504, found: 438.0503.

### 2-([1,1'-Biphenyl]-4-yl)-1,1-difluoro-2-hydroxypropyl 4-bromobenzenesulfonate (**3l**)

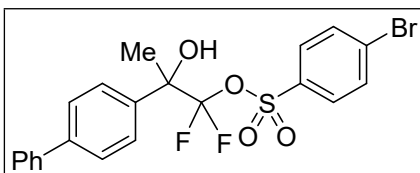

Flash column chromatography on silica gel (eluent: PE/EA = 6/1, v/v)

to afford **3l**. Light yellow oil (58.8 mg, 61%). <sup>1</sup>H NMR (400 MHz, CDCl<sub>3</sub>) δ 7.61 – 7.56 (m, 4H), 7.55 – 7.44 (m, 8H), 7.38 (t, *J* = 7.4 Hz,

1H), 1.75 (s, 3H). <sup>13</sup>C NMR (100 MHz, CDCl<sub>3</sub>) δ 141.44, 140.26, 137.11, 135.72, 132.55, 129.92, 129.42, 129.04, 127.81, 127.22, 126.83, 126.80, 123.38 (t, *J* = 285.0 Hz), 76.03 (t, *J* = 27.0 Hz), 23.61. <sup>19</sup>F NMR (377 MHz, CDCl<sub>3</sub>) δ -82.36, -82.43. HR-GC-MS (*m/z*): calcd for C<sub>21</sub>H<sub>17</sub>BrF<sub>2</sub>O<sub>4</sub>S [M]: 481.9999, found: 482.0003.

### 2-([1,1'-Biphenyl]-4-yl)-1,1-difluoro-2-hydroxypropyl 4-cyanobenzenesulfonate (**3m**)

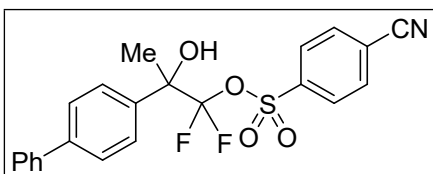

Flash column chromatography on silica gel (eluent: PE/EA = 6/1,

v/v) to afford **3m**. White solid (48.1 mg, 56%), mp 141.9-142.7 °C.

<sup>1</sup>H NMR (400 MHz, CDCl<sub>3</sub>) δ 7.80 (d, *J* = 8.2 Hz, 2H), 7.65 (d, *J* =

8.3 Hz, 2H), 7.59 (d, *J* = 7.4 Hz, 2H), 7.54 – 7.46 (m, 6H), 7.40 (t, *J* = 7.4 Hz, 1H), 2.56 (s, 1H), 1.77 (s, 3H). <sup>13</sup>C NMR (100 MHz, CDCl<sub>3</sub>) δ 141.55, 140.78, 139.99, 136.94, 132.89, 129.20, 128.54, 128.01, 127.08, 126.90, 126.78, 123.54 (t, *J* = 285.0 Hz), 118.03, 116.81, 75.96 (t, *J* = 27.0 Hz), 23.48. <sup>19</sup>F NMR (377 MHz, CDCl<sub>3</sub>) δ -82.03, -82.20. HR-GC-MS (*m/z*): calcd for C<sub>22</sub>H<sub>17</sub>F<sub>2</sub>NO<sub>4</sub>S [M]: 429.0846, found: 429.0850.

### 1,1-Difluoro-2-hydroxy-2-(naphthalen-2-yl)propyl 4-methylbenzenesulfonate (**3n**)



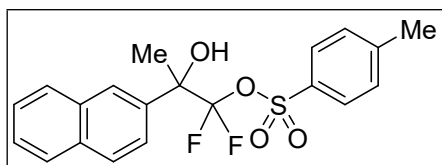

Flash column chromatography on silica gel (eluent: PE/EA = 6/1, v/v) to afford **3n**. Colorless oil (52.7 mg, 67%). <sup>1</sup>H NMR (400 MHz, CDCl<sub>3</sub>) δ 7.85 (d, *J* = 1.8 Hz, 1H), 7.82 – 7.78 (m, 1H), 7.76 – 7.68 (m, 2H), 7.54 – 7.45 (m, 5H), 6.94 (d, *J* = 8.1 Hz, 2H), 2.78

(s, 1H), 2.26 (s, 3H), 1.79 (s, 3H). <sup>13</sup>C NMR (100 MHz, CDCl<sub>3</sub>) δ 145.65, 135.75, 133.42, 133.03, 132.76, 129.58, 128.52, 127.88, 127.74, 127.46, 126.63, 126.28, 125.90, 123.91, 123.28 (t, *J* = 284.0 Hz), 76.29 (t, *J* = 27.0 Hz), 23.70, 21.69. <sup>19</sup>F NMR (377 MHz, CDCl<sub>3</sub>) δ -82.24, -82.34. HRMS-ESI (*m/z*): calcd for C<sub>20</sub>H<sub>19</sub>F<sub>2</sub>O<sub>4</sub>S [*M* + H]<sup>+</sup>: 393.0972, found: 393.0972.

### 1,1-Difluoro-2-hydroxy-2-(naphthalen-2-yl)propyl [1,1'-biphenyl]-4-sulfonate (**3o**)

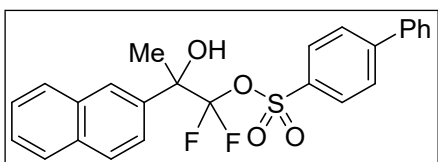

Flash column chromatography on silica gel (eluent: PE/EA = 6/1, v/v) to afford **3o**. Colorless oil (54.5 mg, 60%). <sup>1</sup>H NMR (400 MHz, CDCl<sub>3</sub>) δ 7.89 (d, *J* = 1.8 Hz, 1H), 7.78 – 7.72 (m, 2H), 7.70 (d, *J* =

8.8 Hz, 1H), 7.65 (d, *J* = 8.3 Hz, 2H), 7.55 – 7.51 (m, 1H), 7.49 – 7.40 (m, 7H), 7.34 (d, *J* = 8.4 Hz, 2H), 2.77 (s, 1H), 1.82 (s, 3H). <sup>13</sup>C NMR (100 MHz, CDCl<sub>3</sub>) δ 147.19, 138.70, 135.74, 134.88, 133.00, 132.77, 129.13, 128.96, 128.49, 128.37, 127.78, 127.44, 127.09, 126.66, 126.39, 125.93, 123.90, 123.38 (t, *J* = 285.0 Hz), 76.31 (t, *J* = 27.0 Hz), 23.72. <sup>19</sup>F NMR (377 MHz, CDCl<sub>3</sub>) δ -82.06, -82.24. HR-GC-MS (*m/z*): calcd for C<sub>25</sub>H<sub>20</sub>FO<sub>2</sub>S [*M*]: 454.1050, found: 454.1058.

### 1,1-Difluoro-2-hydroxy-2-(naphthalen-2-yl)propyl 4-chlorobenzenesulfonate (**3p**)

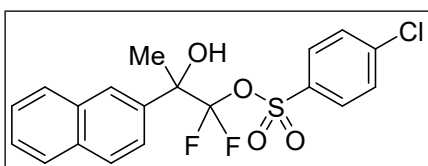

Flash column chromatography on silica gel (eluent: PE/EA = 6/1, v/v) to afford **3p**. Light yellow oil (52.7 mg, 64%). <sup>1</sup>H NMR (400 MHz, CDCl<sub>3</sub>) δ 7.87 – 7.81 (m, 2H), 7.79 – 7.74 (m, 1H), 7.71 (d, *J* = 8.7 Hz, 1H), 7.53 (td, *J* = 6.6, 6.0, 3.5 Hz, 2H), 7.48 (t, *J* = 8.7 Hz, 3H),

7.06 (d, *J* = 8.5 Hz, 2H), 2.65 (s, 1H), 1.82 (s, 3H). <sup>13</sup>C NMR (100 MHz, CDCl<sub>3</sub>) δ 141.13, 135.51, 134.80, 133.06, 132.72, 129.28, 129.20, 128.43, 127.84, 127.53, 126.89, 126.60, 125.90, 123.77, 123.35 (t, *J* = 285.0 Hz), 76.27 (t, *J* = 27.0 Hz), 23.60. <sup>19</sup>F NMR (377 MHz, CDCl<sub>3</sub>) δ -82.08, -82.16. HR-GC-MS (*m/z*): calcd for C<sub>19</sub>H<sub>15</sub>ClF<sub>2</sub>O<sub>4</sub>S [*M*]: 412.0348, found: 412.0349.

### 4-(1-(Phenylsulfonyl)ethyl)-1,1'-biphenyl (**5a**)

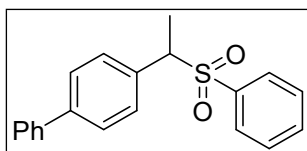

Purified by preparative TLC (eluent: PE/EA = 6/1, v/v) to afford **5a**. Yellow solid (37.3 mg, 58%), mp 167.4-168.3 °C. <sup>1</sup>H NMR (400 MHz, CDCl<sub>3</sub>) δ 7.58 (dd, *J* = 15.4, 7.7 Hz, 5H), 7.49 (d, *J* = 8.0 Hz, 2H), 7.43 (dt, *J* = 10.4, 7.6 Hz, 4H), 7.36 (t, *J* = 7.3 Hz, 1H), 7.21 (d, *J* = 8.0 Hz, 2H), 4.29 (q, *J* = 7.1 Hz, 1H).

<sup>13</sup>C NMR (101 MHz, CDCl<sub>3</sub>) δ 141.73, 140.35, 136.97, 133.70, 132.68, 129.94, 129.35, 128.97, 128.81, 127.76, 127.17, 127.14, 65.90, 14.21. HR-DART-MS (*m/z*): calcd for C<sub>20</sub>H<sub>19</sub>O<sub>2</sub>S [M + H]<sup>+</sup>: 323.1100, found: 323.1099.

### 1-Methoxy-4-(1-(phenylsulfonyl)ethyl)benzene (**5b**)

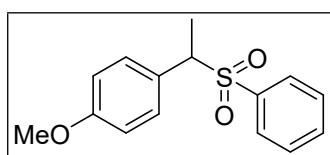

Purified by preparative TLC (eluent: PE/EA = 6/1, v/v) to afford **5b**. Yellow solid (22.1 mg, 40%), mp 92.4-93.5 °C. <sup>1</sup>H NMR (400 MHz, CDCl<sub>3</sub>) δ 7.56 (d, *J* = 7.7 Hz, 3H), 7.45 – 7.39 (m, 2H), 7.08 – 7.03 (m, 2H), 6.80 – 6.74 (m, 2H), 4.20 (q, *J* = 7.2 Hz, 1H), 3.79 (s, 3H), 1.73 (d, *J* = 7.2 Hz, 3H). <sup>13</sup>C NMR (100

MHz, CDCl<sub>3</sub>) δ 160.0, 137.0, 133.6, 130.7, 129.3, 128.7, 125.6, 113.9, 65.5, 55.4, 14.2. HR-DART-MS (*m/z*): calcd for C<sub>15</sub>H<sub>20</sub>NO<sub>3</sub>S [M + NH<sub>4</sub>]<sup>+</sup>: 294.1158, found: 294.1158.

### 2-(1-(Phenylsulfonyl)ethyl)naphthalene (**5c**)

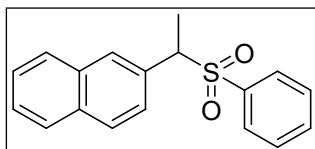

Purified by preparative TLC (eluent: PE/EA = 6/1, v/v) to afford **5c**. Yellow solid (18.9 mg, 32%), mp 137.8-138.9 °C. <sup>1</sup>H NMR (400 MHz, CDCl<sub>3</sub>) δ 7.83 – 7.79 (m, 1H), 7.75 – 7.68 (m, 2H), 7.58 – 7.50 (m, 4H), 7.50 – 7.44 (m, 2H),

7.35 (t, *J* = 7.7 Hz, 2H), 7.30 – 7.27 (m, 1H), 4.41 (q, *J* = 7.2 Hz, 1H), 1.86 (d, *J* = 7.2 Hz, 3H). <sup>13</sup>C NMR (100 MHz, CDCl<sub>3</sub>) δ 136.9, 133.7, 133.3, 133.0, 131.3, 129.3, 129.2, 128.8, 128.2, 128.2, 127.7, 126.8, 126.7, 126.5, 66.3, 14.4. HR-DART-MS (*m/z*): calcd for C<sub>18</sub>H<sub>20</sub>NO<sub>2</sub>S [M + NH<sub>4</sub>]<sup>+</sup>: 314.1209, found: 314.1209.

### 4-(1-Tosylethyl)-1,1'-biphenyl (**5d**)

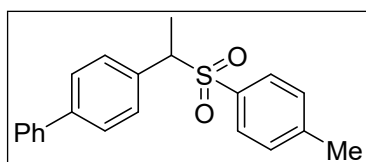

Purified by preparative TLC (eluent: PE/EA = 6/1, v/v) to afford **5d**. Yellow solid (24.9 mg, 37%), mp 180.3-182.4 °C. <sup>1</sup>H NMR (400 MHz, CDCl<sub>3</sub>) δ 7.57 (d, *J* = 8.0 Hz, 2H), 7.51 – 7.42 (m, 6H), 7.39 – 7.35 (m, 1H), 7.22 (t, *J* = 7.4 Hz, 4H), 4.27 (q, *J* = 7.2 Hz, 1H), 2.40 (s, 3H), 1.82 –

1.74 (m, 3H). <sup>13</sup>C NMR (100 MHz, CDCl<sub>3</sub>) δ 144.7, 141.7, 140.4, 134.0, 132.9, 130.0, 129.5, 129.4, 129.0, 127.7, 127.2, 127.1, 65.9, 21.8, 14.3. HR-GC-MS (*m/z*): calcd for C<sub>21</sub>H<sub>20</sub>O<sub>2</sub>S [M]: 336.1184, found: 336.1186.

#### 4-(1-((4-(Tert-butyl)phenyl)sulfonyl)ethyl)-1,1'-biphenyl (5e)

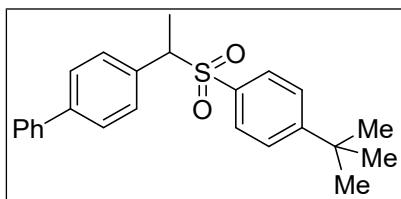

Purified by preparative TLC (eluent: PE/EA = 6/1, v/v) to afford **5e**.

Light yellow oil (30.3 mg, 40%). <sup>1</sup>H NMR (400 MHz, CDCl<sub>3</sub>) δ 7.58 – 7.52 (m, 4H), 7.51 – 7.47 (m, 2H), 7.47 – 7.41 (m, 4H), 7.39 – 7.33 (m, 1H), 7.24 (d, *J* = 8.2 Hz, 2H), 4.27 (q, *J* = 7.1 Hz, 1H), 1.78 (d, *J* = 7.1

Hz, 3H), 1.32 (s, 9H). <sup>13</sup>C NMR (100 MHz, CDCl<sub>3</sub>) δ 157.7, 141.7, 140.5, 134.0, 132.8, 130.0, 129.2, 129.0, 127.7, 127.2, 127.1, 125.8, 65.9, 35.4, 31.2, 14.4. HR-DART-MS (*m/z*): calcd for C<sub>24</sub>H<sub>30</sub>NO<sub>2</sub>S [M + NH<sub>4</sub>]<sup>+</sup>: 396.1992, found: 396.1992.

#### 4-((1-([1,1'-Biphenyl]-4-yl)ethyl)sulfonyl)-1,1'-biphenyl (5f)

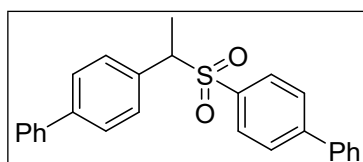

Purified by preparative TLC (eluent: PE/EA = 6/1, v/v) to afford **5f**.

Yellow solid (28.7 mg, 36%), mp 258.9-259.7 °C. <sup>1</sup>H NMR (400 MHz, CDCl<sub>3</sub>) δ 7.68 – 7.61 (m, 4H), 7.58 (dd, *J* = 7.9, 6.0 Hz, 4H), 7.53 – 7.49 (m, 3H), 7.48 – 7.41 (m, 5H), 7.36 (t, *J* = 7.3 Hz, 1H), 7.28 (s, 1H), 4.33 (q,

*J* = 7.2 Hz, 1H), 1.83 (d, *J* = 7.1 Hz, 3H). <sup>13</sup>C NMR (100 MHz, CDCl<sub>3</sub>) δ 146.6, 141.8, 140.4, 139.2, 135.5, 132.7, 130.0, 129.9, 129.2, 129.0, 128.8, 127.8, 127.5, 127.4, 127.2, 66.0, 14.4. HR-DART-MS (*m/z*): calcd for C<sub>26</sub>H<sub>26</sub>NO<sub>2</sub>S [M + NH<sub>4</sub>]<sup>+</sup>: 416.1679, found: 416.1677.

#### 4-(1-((4-Fluorophenyl)sulfonyl)ethyl)-1,1'-biphenyl (5g)

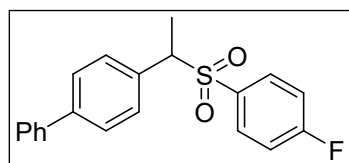

Purified by preparative TLC (eluent: PE/EA = 6/1, v/v) to afford **5g**. Yellow

solid (31.3 mg, 46%), mp 152.4-153.5 °C. <sup>1</sup>H NMR (400 MHz, CDCl<sub>3</sub>) δ 7.60 – 7.55 (m, 4H), 7.52 – 7.48 (m, 2H), 7.48 – 7.42 (m, 2H), 7.39 – 7.34 (m, 1H), 7.21 (d, *J* = 7.9 Hz, 2H), 7.11 – 7.05 (m, 2H), 4.28 (q, *J* = 7.1 Hz,

1H), 1.81 (d, *J* = 6.2 Hz, 3H). <sup>13</sup>C NMR (100 MHz, CDCl<sub>3</sub>) δ 167.2, 164.6, 141.9, 140.2, 132.9 (d, *J* = 3.2 Hz), 132.6, 132.2 (d, *J* = 9.6 Hz), 130.9, 129.0, 127.8, 127.2 (d, *J* = 4.1 Hz), 116.1 (d, *J* = 22.5 Hz), 66.1, 14.1. HR-DART-MS (*m/z*): calcd for C<sub>20</sub>H<sub>21</sub>NFO<sub>2</sub>S [M + NH<sub>4</sub>]<sup>+</sup>: 358.1272, found: 358.1271.

#### 4-(1-((4-Bromophenyl)sulfonyl)ethyl)-1,1'-biphenyl (5h)

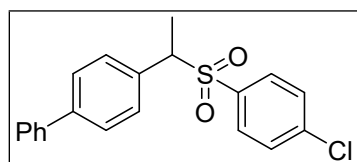

Purified by preparative TLC (eluent: PE/EA = 6/1, v/v) to afford **5h**.

Yellow solid (38.5 mg, 54%), mp 144.1-145.6 °C. <sup>1</sup>H NMR (400 MHz,

CDCl<sub>3</sub>)  $\delta$  7.61 – 7.55 (m, 4H), 7.50 (dd,  $J$  = 8.3, 2.0 Hz, 2H), 7.48 – 7.42 (m, 2H), 7.39 – 7.34 (m, 1H), 7.21 (dd,  $J$  = 8.3, 2.0 Hz, 2H), 7.11 – 7.05 (m, 2H), 4.28 (q,  $J$  = 7.3 Hz, 1H), 1.81 (d,  $J$  = 7.2 Hz, 3H). <sup>13</sup>C NMR (100 MHz, CDCl<sub>3</sub>)  $\delta$  167.2, 164.6, 141.9, 140.2, 132.6, 132.2, 132.1, 129.9, 129.0, 127.9, 127.2, 116.1, 66.1, 29.9, 14.1. HR-DART-MS ( $m/z$ ): calcd for C<sub>20</sub>H<sub>18</sub>ClO<sub>2</sub>S [M + H]<sup>+</sup>: 357.0716, found: 357.0724.

### 2-(1-Tosylethyl)naphthalene (5i)

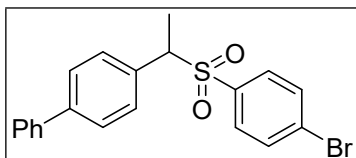

Purified by preparative TLC (eluent: PE/EA = 6/1, v/v) to afford **5i**. Yellow solid (42.1 mg, 53%), mp 136.4-137.6 °C. <sup>1</sup>H NMR (400 MHz, CDCl<sub>3</sub>)  $\delta$  7.56 (t,  $J$  = 8.2 Hz, 4H), 7.51 (d,  $J$  = 8.0 Hz, 2H), 7.48 – 7.41 (m, 4H), 7.38 (d,  $J$  = 7.3 Hz, 1H), 7.22 (d,  $J$  = 7.9 Hz, 2H), 4.28 (q,  $J$  = 7.2 Hz, 1H), 1.80 (d,  $J$  = 7.2 Hz, 3H). <sup>13</sup>C NMR (100 MHz, CDCl<sub>3</sub>)  $\delta$  141.9, 140.2, 136.0, 132.4, 132.1, 130.9, 129.9, 129.2, 129.0, 127.9, 127.3, 127.2, 66.0, 14.1. HR-DART-MS ( $m/z$ ): calcd for C<sub>20</sub>H<sub>21</sub>NBrO<sub>2</sub>S [M + NH<sub>4</sub>]<sup>+</sup>: 418.0471, found: 418.0470.

### 2-(1-([1,1'-Biphenyl]-4-ylsulfonyl)ethyl)naphthalene (5j)

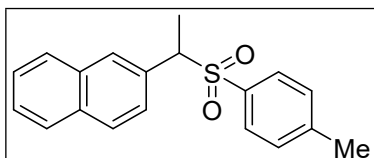

Purified by preparative TLC (eluent: PE/EA = 6/1, v/v) to afford **5j**. White powder (15.5 mg, 25%), mp 149.9-150.3 °C. <sup>1</sup>H NMR (400 MHz, CDCl<sub>3</sub>)  $\delta$  7.82 – 7.79 (m, 1H), 7.73 (dd,  $J$  = 8.8, 6.0 Hz, 2H), 7.58 (d,  $J$  = 1.8 Hz, 1H), 7.50 – 7.46 (m, 2H), 7.43 (d,  $J$  = 8.2 Hz, 2H), 7.29 (dd,  $J$  = 8.5, 1.9 Hz, 1H), 7.15 (d,  $J$  = 8.0 Hz, 2H), 4.39 (q,  $J$  = 7.2 Hz, 1H), 2.37 (s, 3H), 1.84 (d,  $J$  = 7.1 Hz, 3H). <sup>13</sup>C NMR (100 MHz, CDCl<sub>3</sub>)  $\delta$  144.6, 134.0, 133.3, 133.0, 131.5, 129.4, 129.4, 129.1, 128.2, 128.1, 127.7, 126.8, 126.7, 126.4, 66.3, 21.7, 14.5. HR-GC-MS MALDI ( $m/z$ ): calcd for C<sub>19</sub>H<sub>18</sub>O<sub>2</sub>S [M]: 310.1028, found: 310.1029.

### 2-(1-((4-Fluorophenyl)sulfonyl)ethyl)naphthalene (5k)

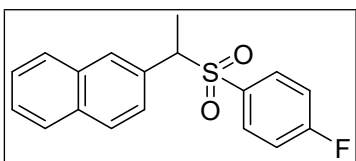

Purified by preparative TLC (eluent: PE/EA = 6/1, v/v) to afford **5k**. Colorless oil (15.7 mg, 25%). <sup>1</sup>H NMR (400 MHz, CDCl<sub>3</sub>)  $\delta$  7.83 – 7.80 (m, 1H), 7.73 (t,  $J$  = 8.8 Hz, 2H), 7.56 (d,  $J$  = 1.8 Hz, 1H), 7.55 – 7.45 (m, 4H), 7.27 (d,  $J$  = 1.9 Hz, 1H), 7.01 (t,  $J$  = 8.6 Hz, 2H), 4.40 (q,  $J$  = 7.2 Hz, 1H), 1.88 (d,  $J$  = 7.1 Hz, 3H). <sup>13</sup>C NMR (100 MHz, CDCl<sub>3</sub>)  $\delta$  167.1, 164.6, 133.4, 133.0, 132.2, 132.1, 131.2,

129.1, 128.3, 128.2, 127.8, 126.9, 126.6 (d,  $J = 3.4$  Hz), 116.1 (d,  $J = 22.6$  Hz), 66.5, 14.3. HR-GC-MS (m/z): calcd for  $C_{18}H_{15}F_2O_4S$  [M]: 314.0777, found: 314.0780.

### 2-(1-((4-Chlorophenyl)sulfonyl)ethyl)naphthalene (5I)

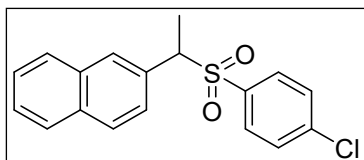

Purified by preparative TLC (eluent: PE/EA = 6/1, v/v) to afford **5I**.

Colorless oil (17.1 mg, 26%).  $^1H$  NMR (400 MHz,  $CDCl_3$ )  $\delta$  7.84 – 7.80 (m, 1H), 7.74 (t,  $J = 7.8$  Hz, 2H), 7.58 (d,  $J = 1.7$  Hz, 1H), 7.50 (td,  $J = 6.9$ , 6.1, 3.7 Hz, 2H), 7.45 (d,  $J = 8.4$  Hz, 2H), 7.32 (d,  $J = 8.3$  Hz, 2H), 7.28 (d,

$J = 1.8$  Hz, 1H), 4.40 (q,  $J = 7.1$  Hz, 1H), 1.87 (d,  $J = 7.1$  Hz, 3H).  $^{13}C$  NMR (100 MHz,  $CDCl_3$ )  $\delta$  140.5, 135.4, 133.4, 133.0, 131.0, 130.8, 129.2, 129.1, 128.4, 128.2, 127.8, 126.9, 126.7, 126.6, 66.5, 14.3. HR-GC-MS (m/z): calcd for  $C_{18}H_{15}ClO_2S$  [M]: 330.0481, found: 330.0482.

### 2-([1,1'-Biphenyl]-4-yl)-1-ethoxy-1,1-difluoropropan-2-ol (6)

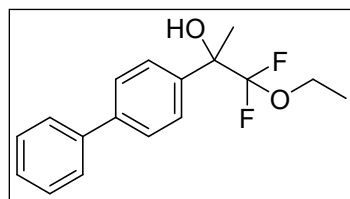

Flash column chromatography on silica gel (eluent: PE/EA = 6/1, v/v) to

afford **6**. Colorless oil (36.2 mg, 62%).  $^1H$  NMR (400 MHz,  $CDCl_3$ )  $\delta$  7.65 – 7.56 (m, 7H), 7.44 (t,  $J = 7.6$  Hz, 2H), 7.35 (t,  $J = 7.3$  Hz, 1H), 4.25 (q,  $J = 13.6$ , 7.0 Hz, 2H), 3.85 (s, 1H), 1.82 (s, 3H), 1.29 (t,  $J = 7.1$  Hz, 3H).  $^{13}C$

NMR (100 MHz,  $CDCl_3$ )  $\delta$  175.75, 141.97, 140.73, 128.90, 127.51, 127.22, 127.15, 125.79, 123.20 (t,  $J = 285.0$  Hz), 75.68 (t,  $J = 27.0$  Hz), 62.66, 26.88, 14.20.  $^{19}F$  NMR (377 MHz,  $CDCl_3$ )  $\delta$  -86.08, -86.46. HRMS-ESI (m/z): calcd for  $C_{17}H_{19}F_2O_2$  [M+H] $^+$ : 293.1353, found: 293.1352.

## 4. NMR spectra for new compounds

$^1\text{H}$  NMR and  $^{13}\text{C}$  NMR spectrum of compound **3a**

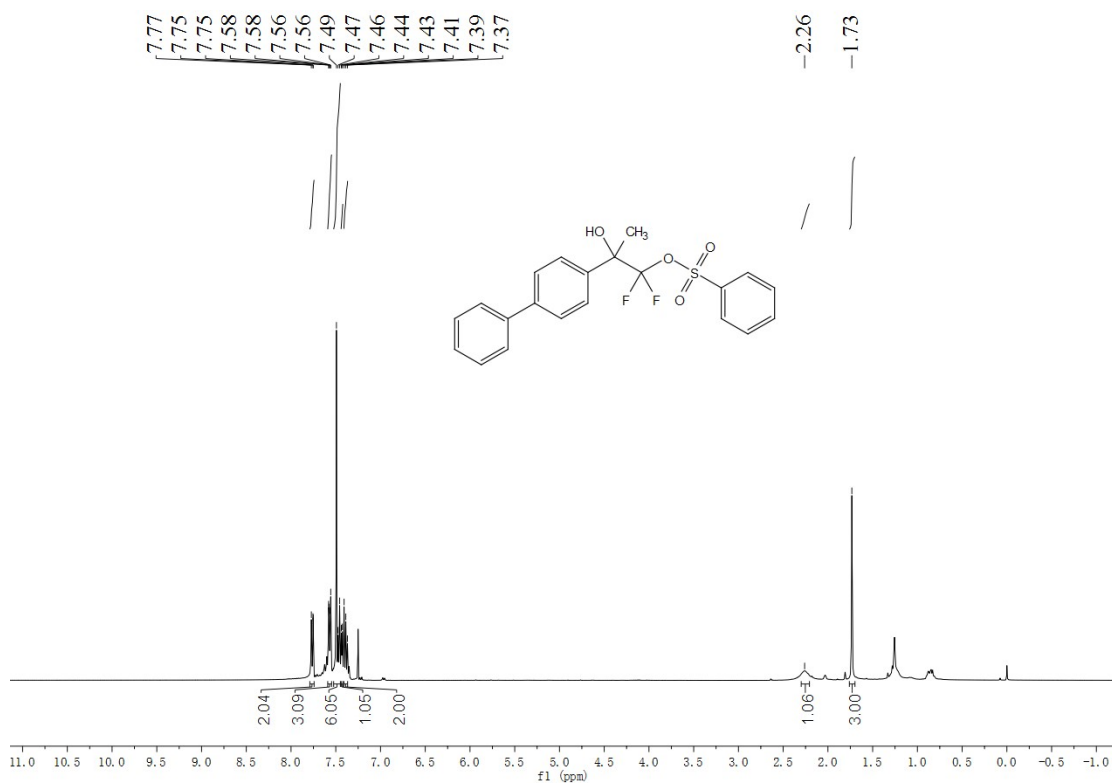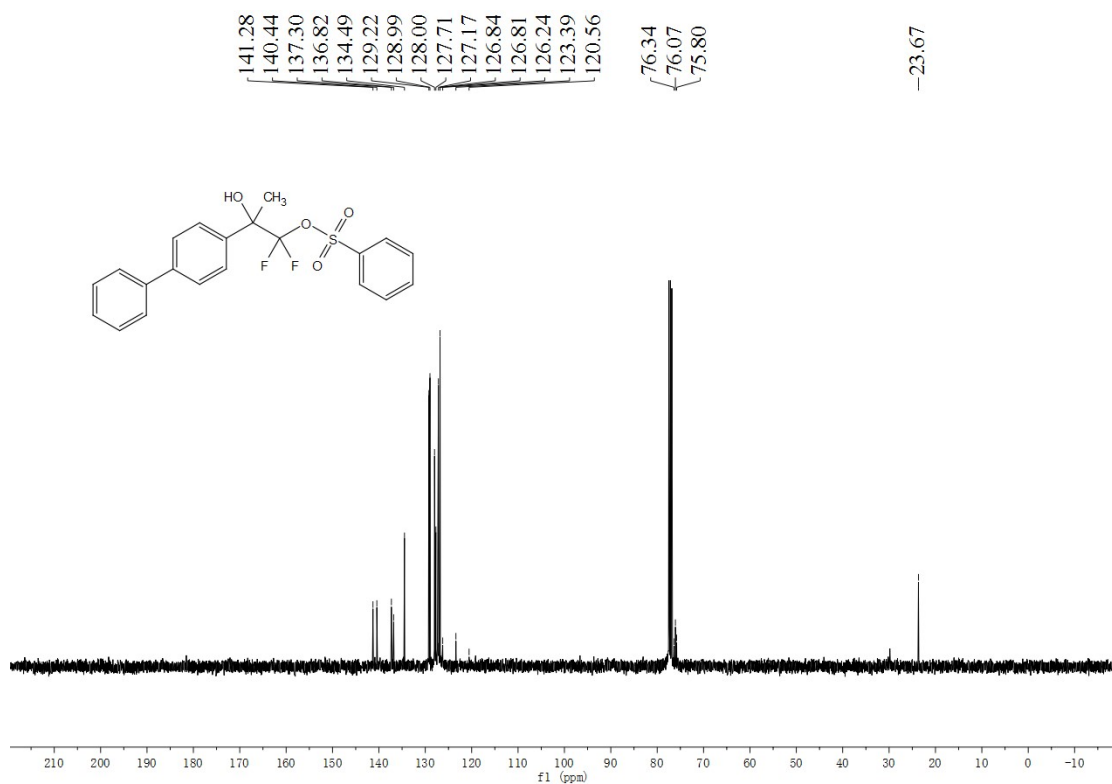

<sup>1</sup>H NMR and <sup>13</sup>C NMR spectrum of compound **3b**

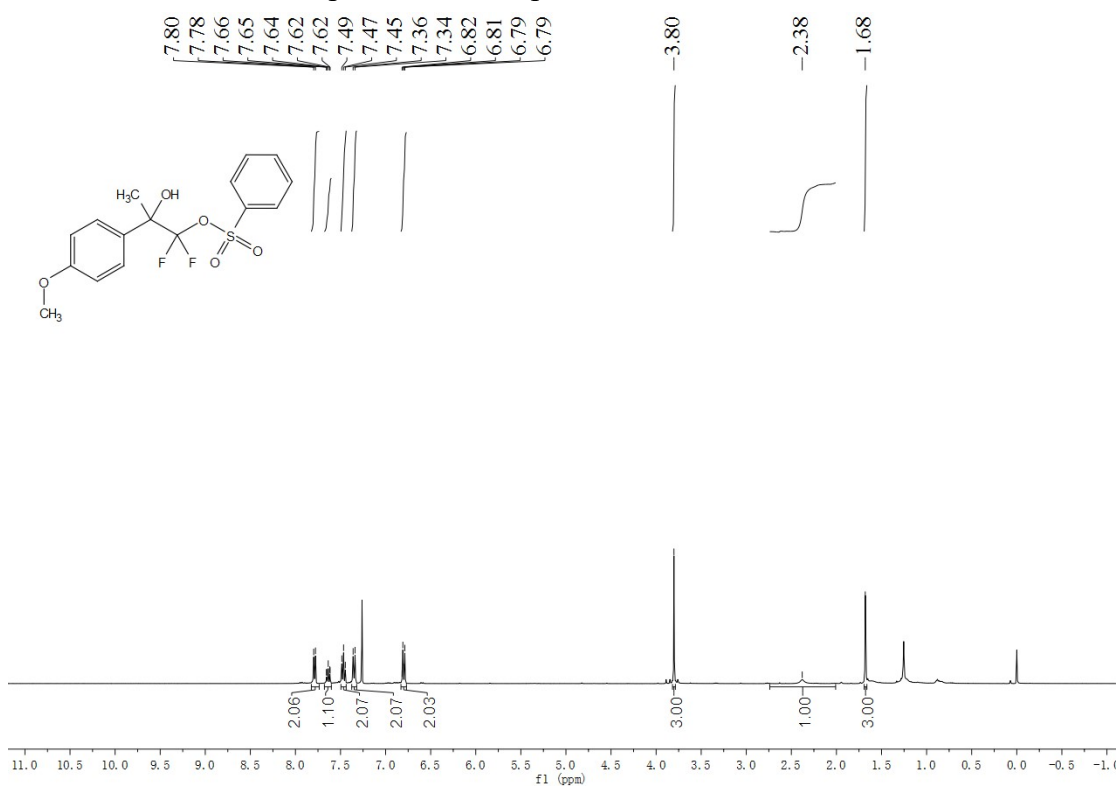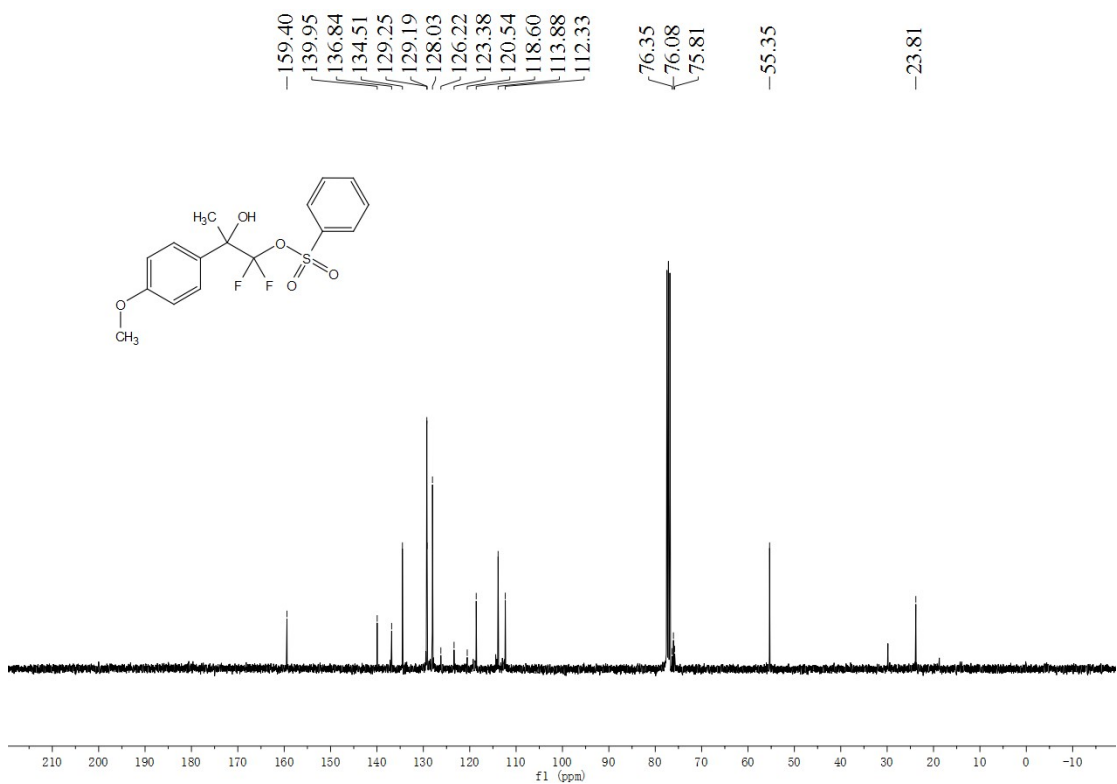

<sup>1</sup>H NMR and <sup>13</sup>C NMR spectrum of compound **3c**

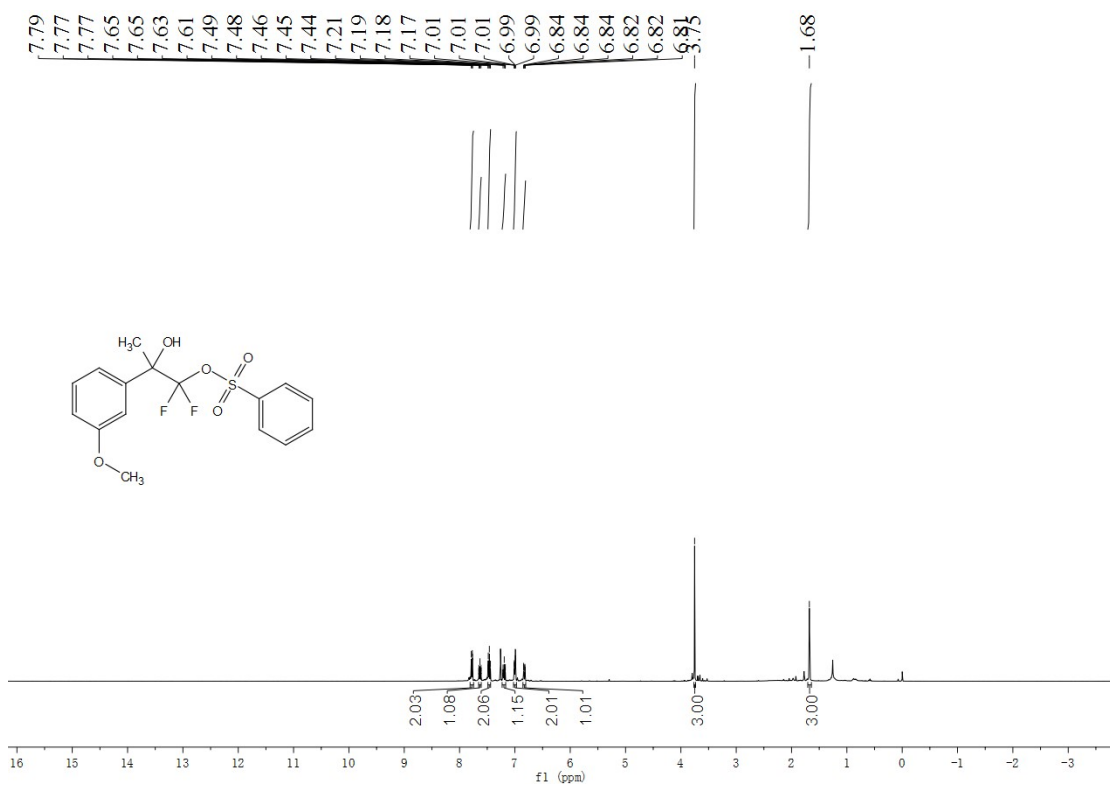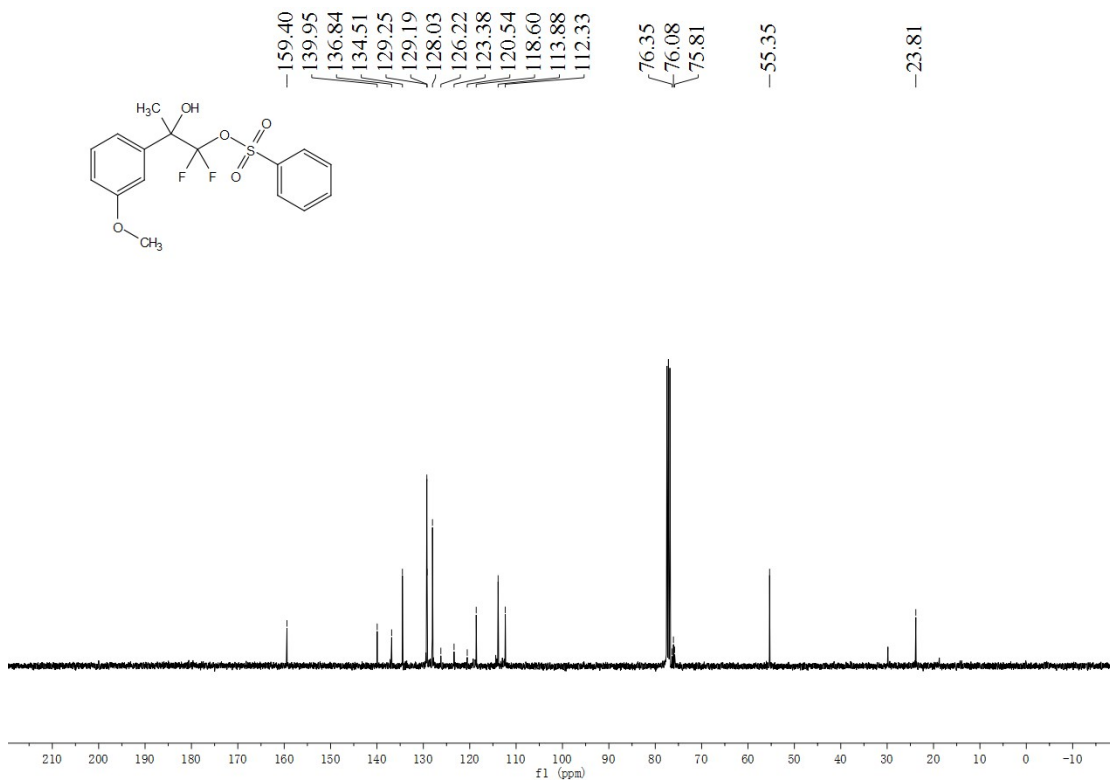



<sup>1</sup>H NMR and <sup>13</sup>C NMR spectrum of compound **3d**

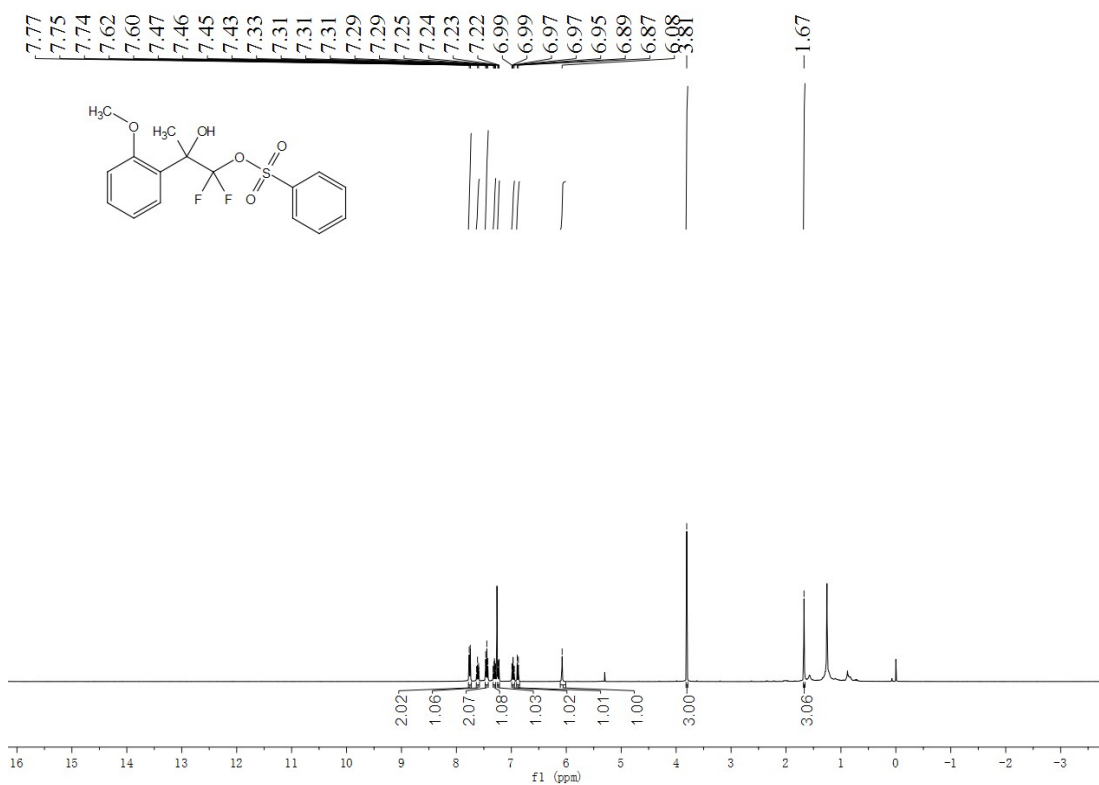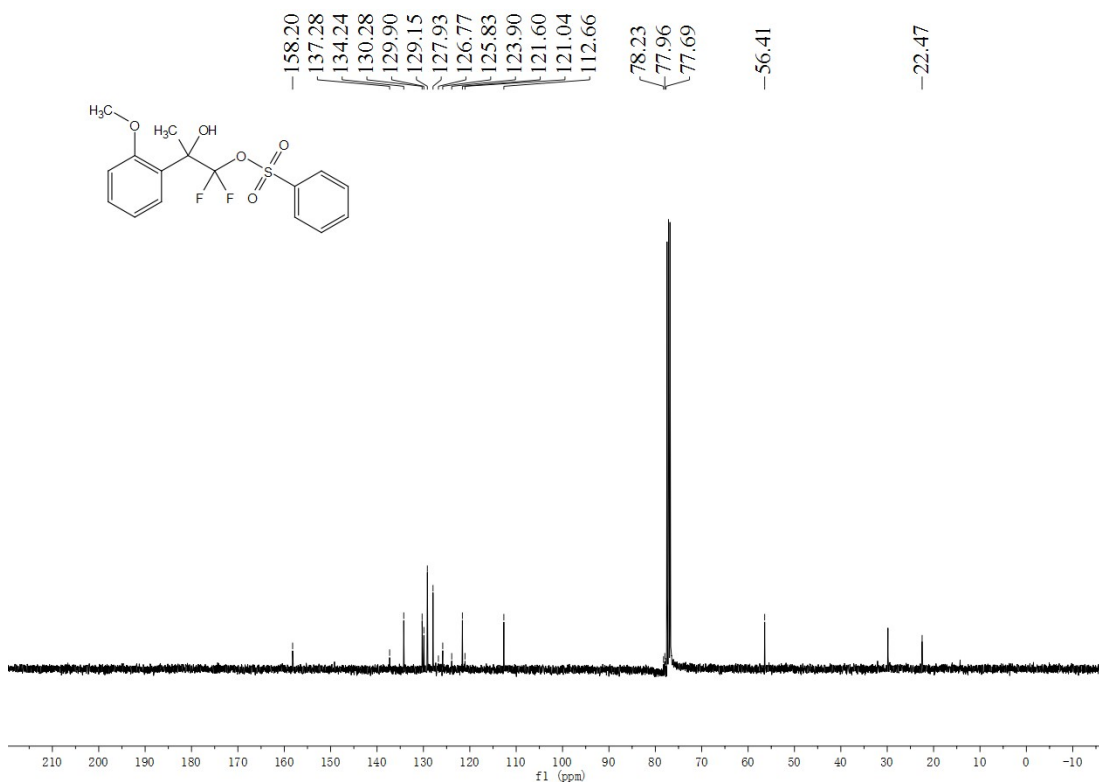

$^1\text{H}$  NMR and  $^{13}\text{C}$  NMR spectrum of compound **3e**

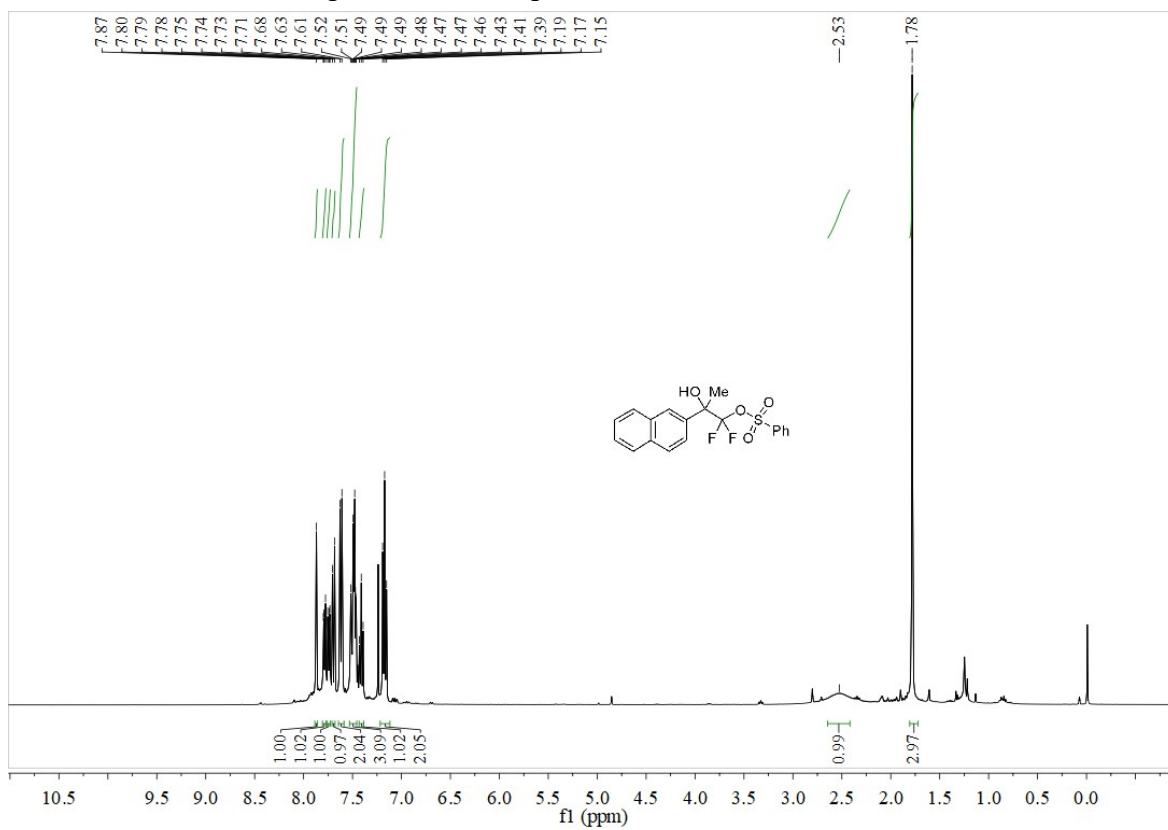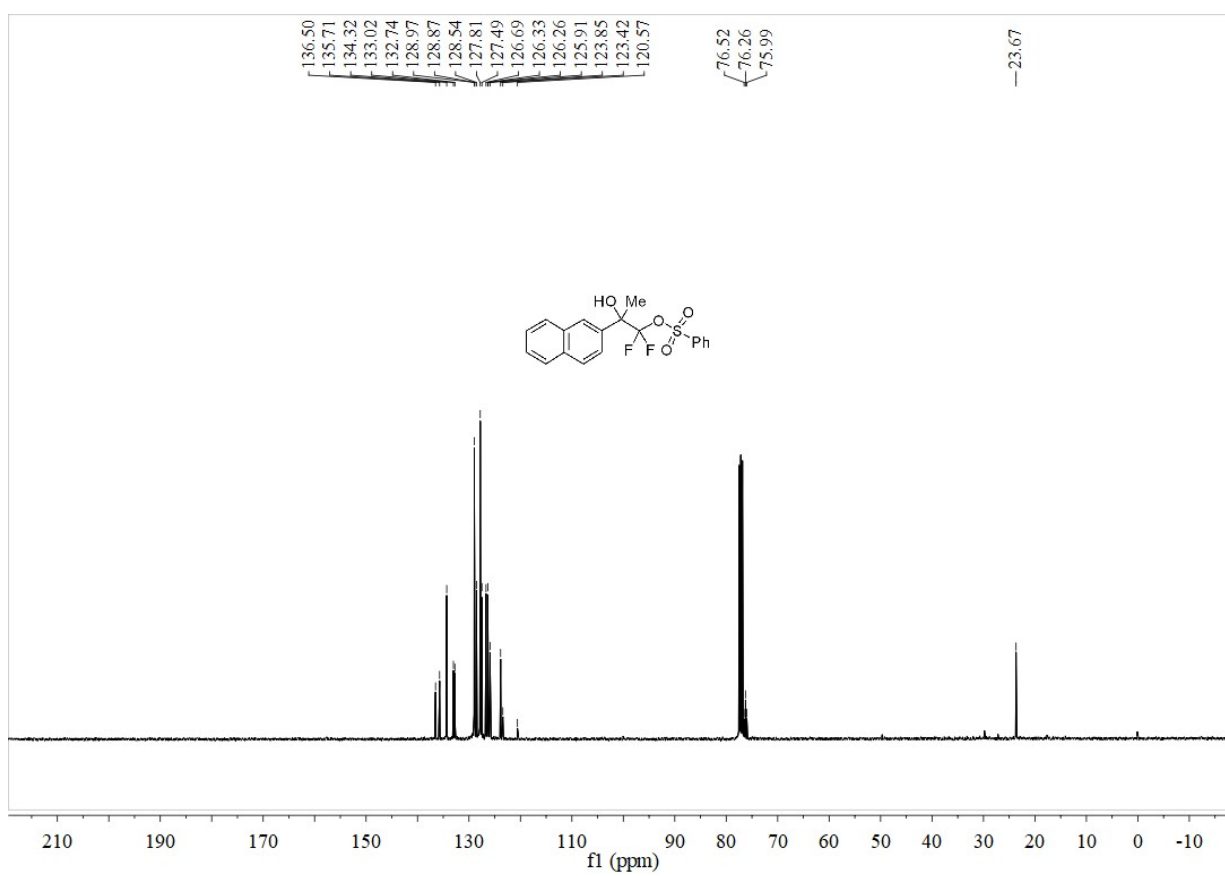

<sup>1</sup>H NMR and <sup>13</sup>C NMR spectrum of compound **3f**

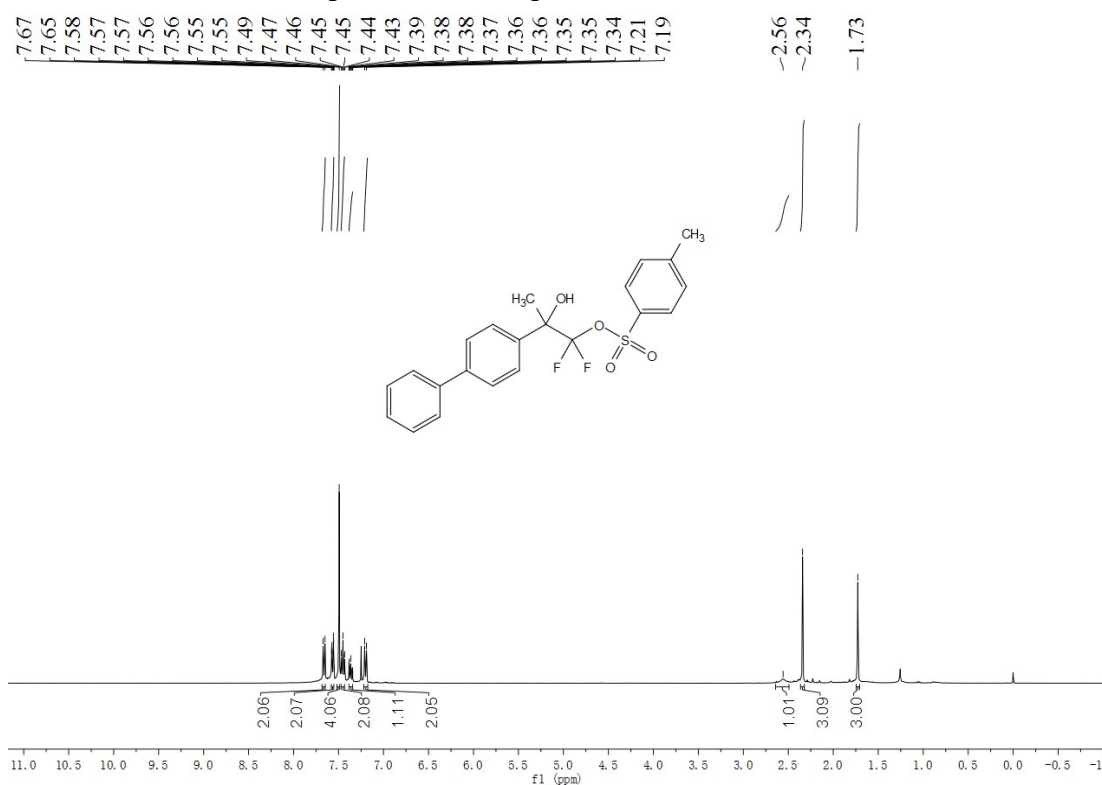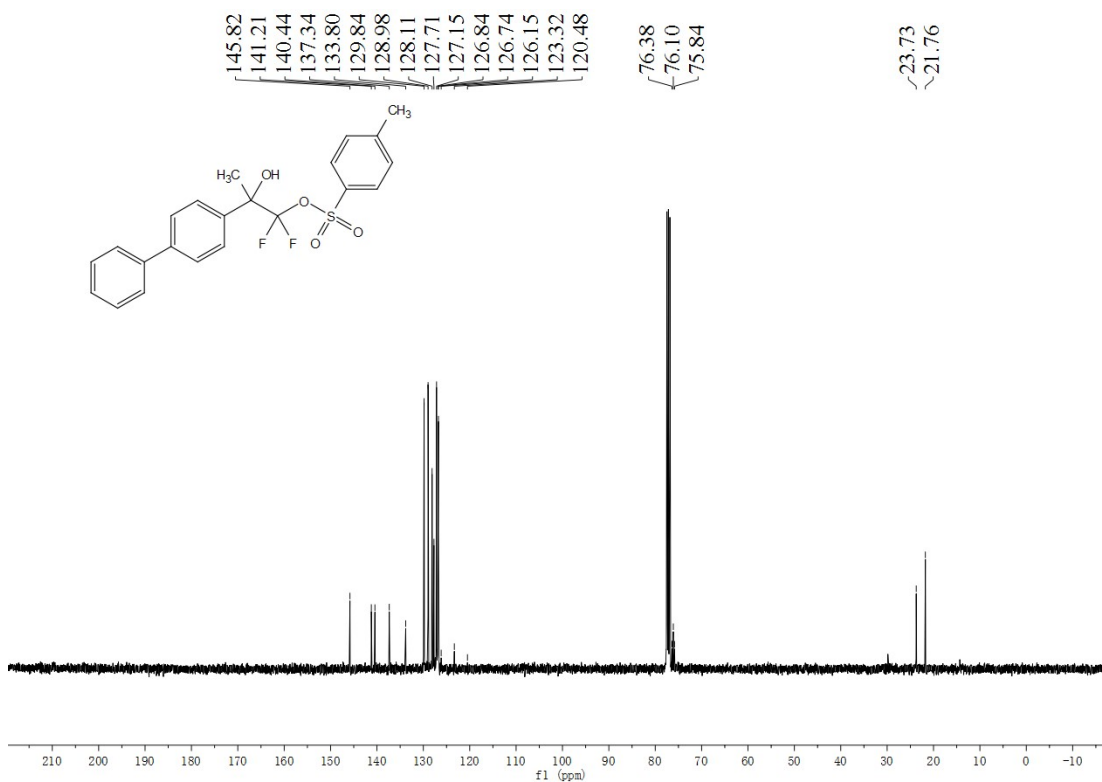

<sup>1</sup>H NMR and <sup>13</sup>C NMR spectrum of compound **3g**

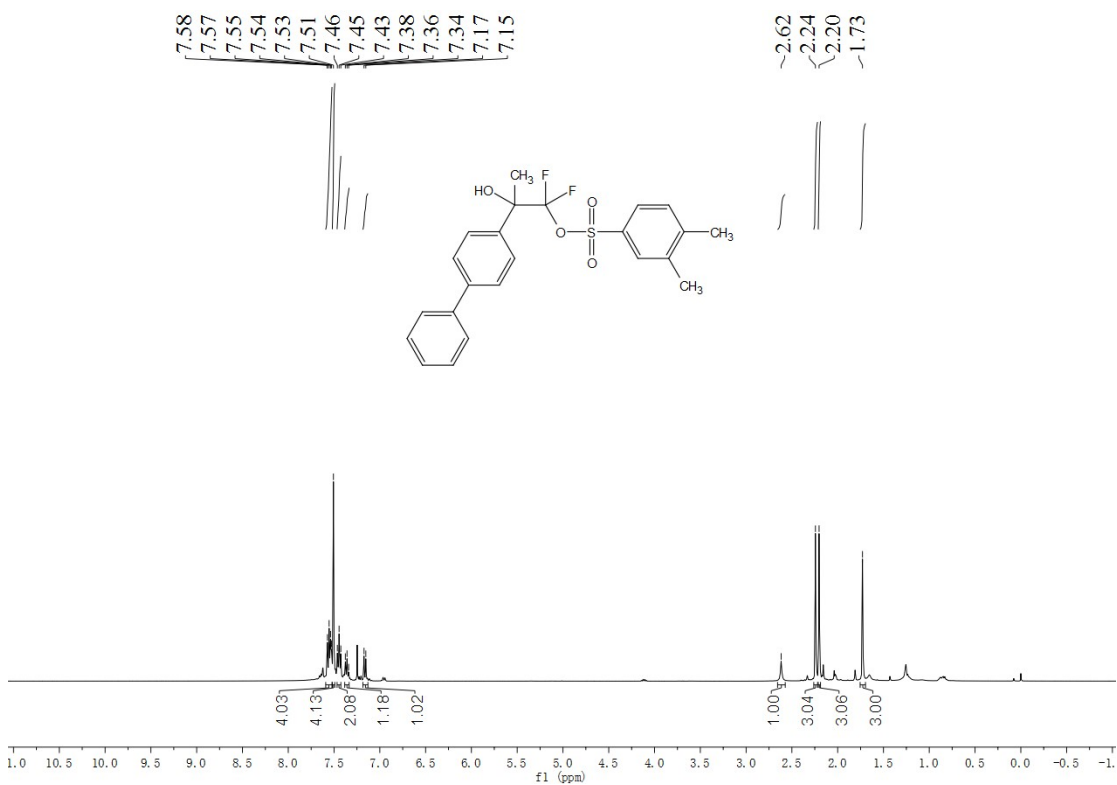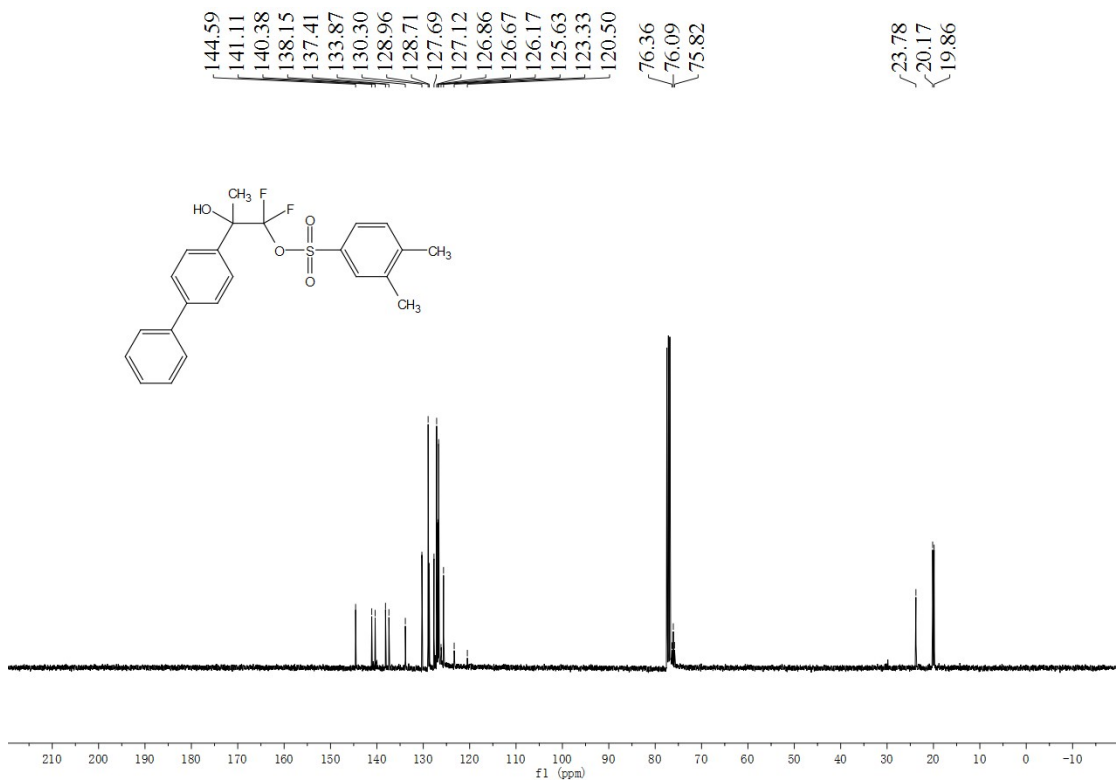

<sup>1</sup>H NMR and <sup>13</sup>C NMR spectrum of compound **3h**

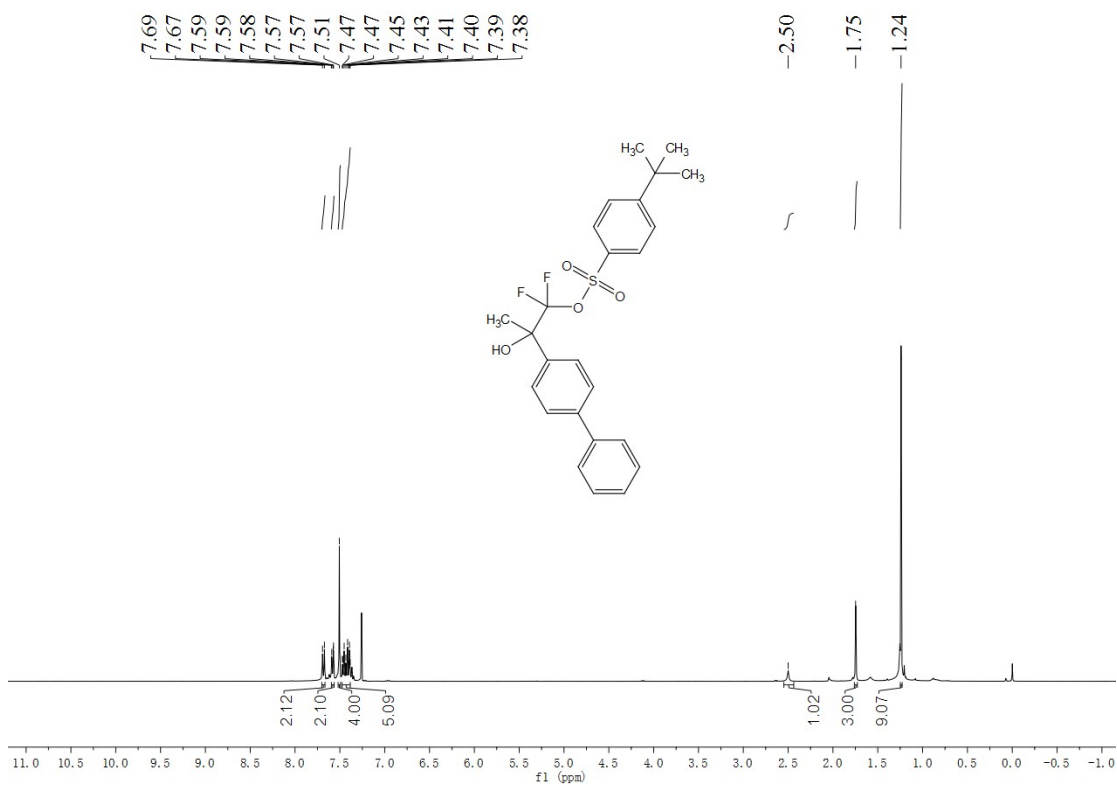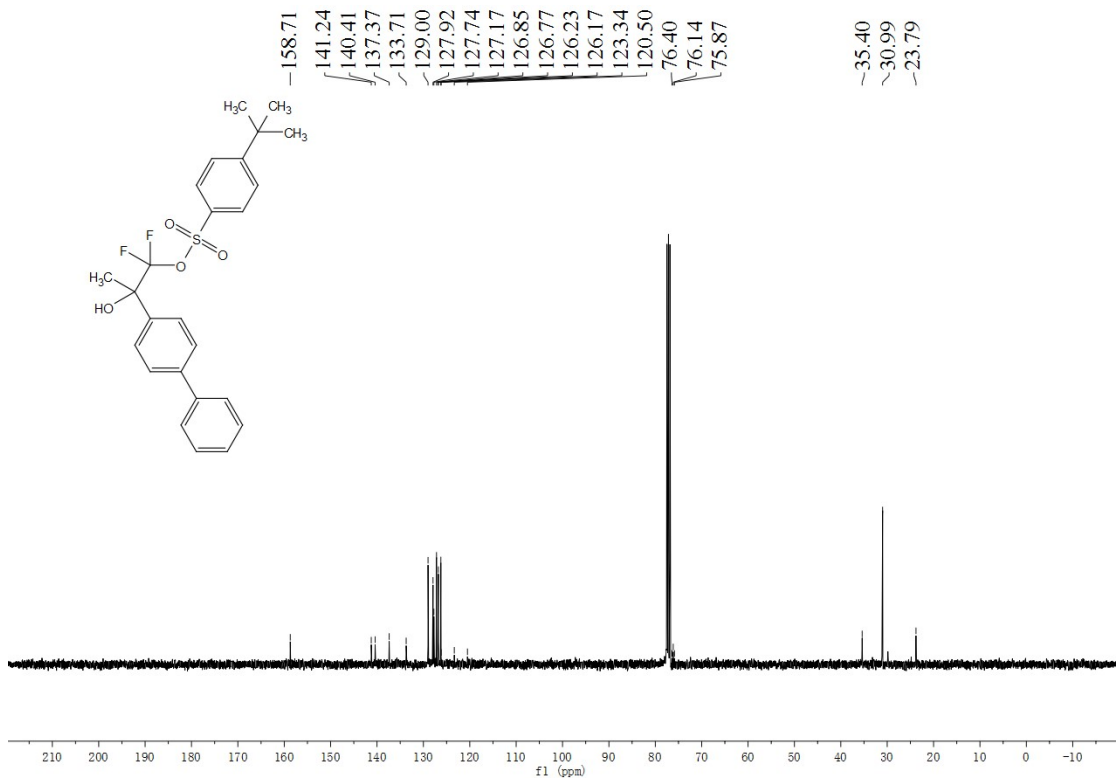





$^1\text{H}$  NMR and  $^{13}\text{C}$  NMR spectrum of compound **3k**

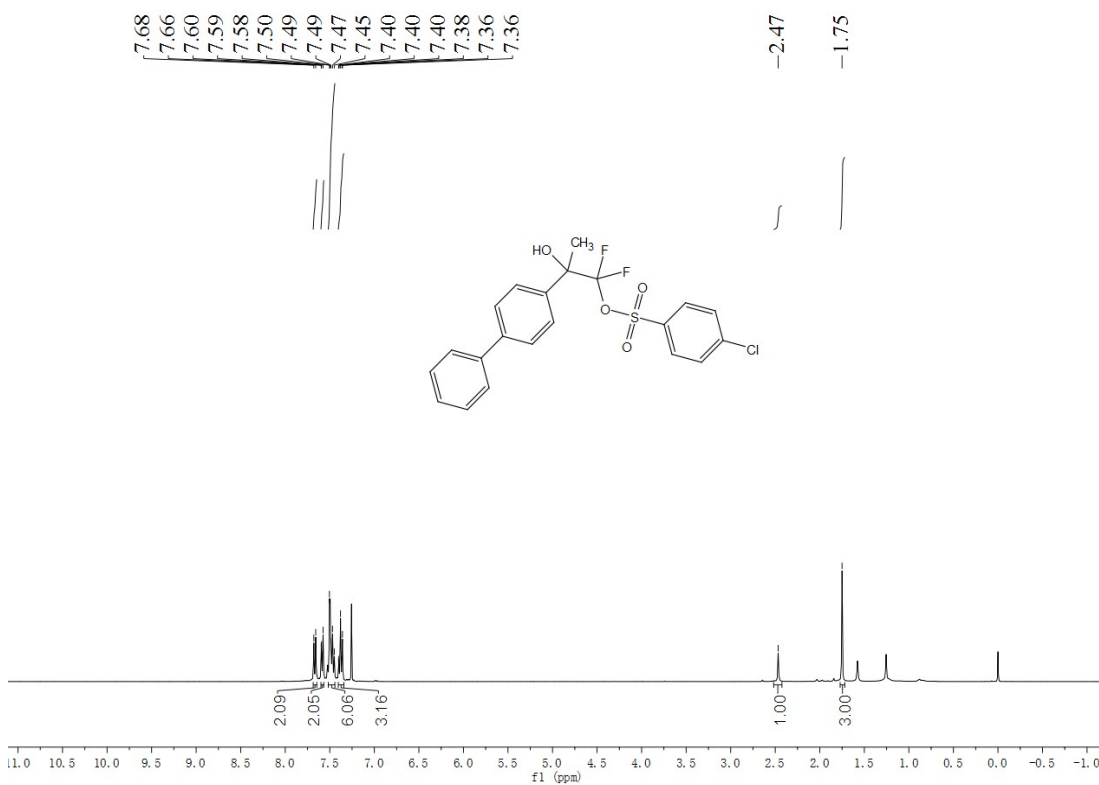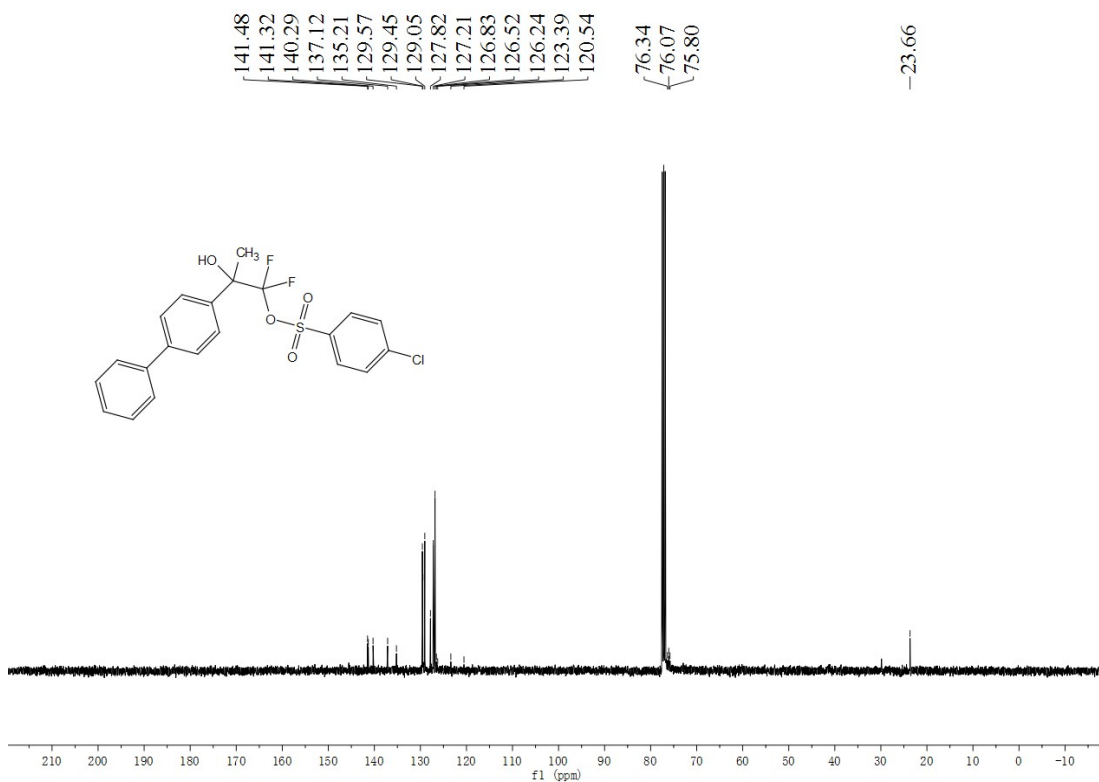



# $^1\text{H}$ NMR and $^{13}\text{C}$ NMR spectrum of compound **31**

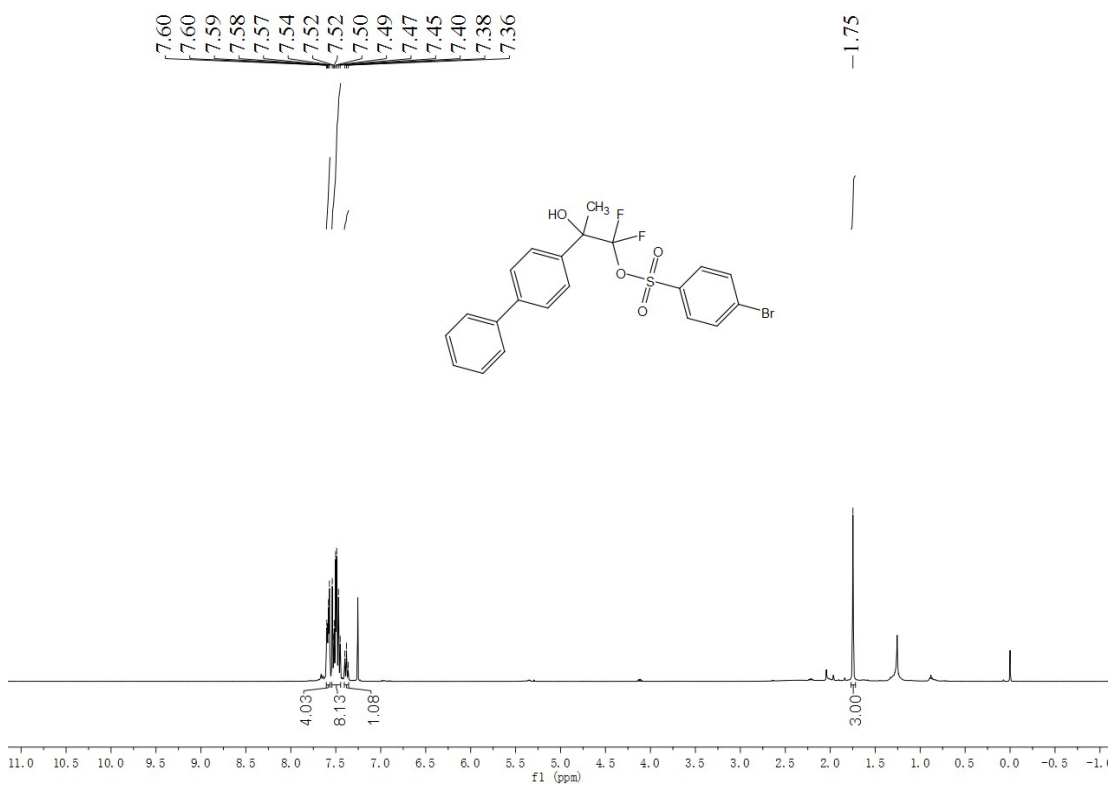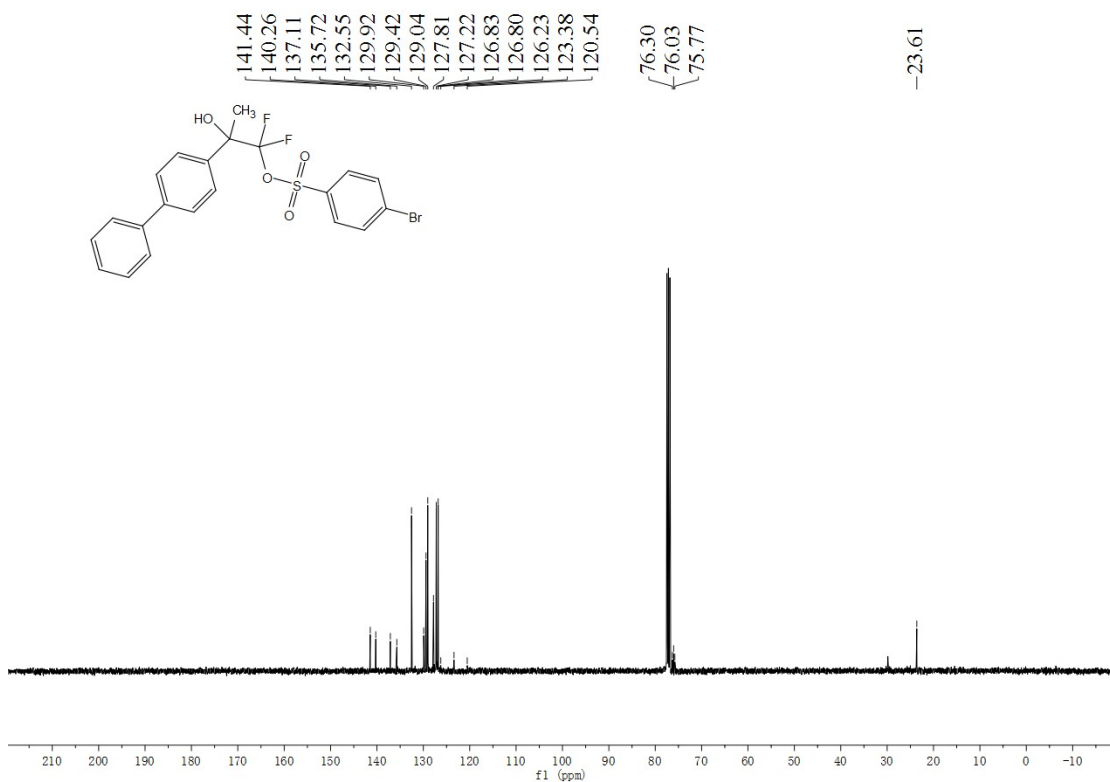

# $^1\text{H}$ NMR and $^{13}\text{C}$ NMR spectrum of compound **3m**

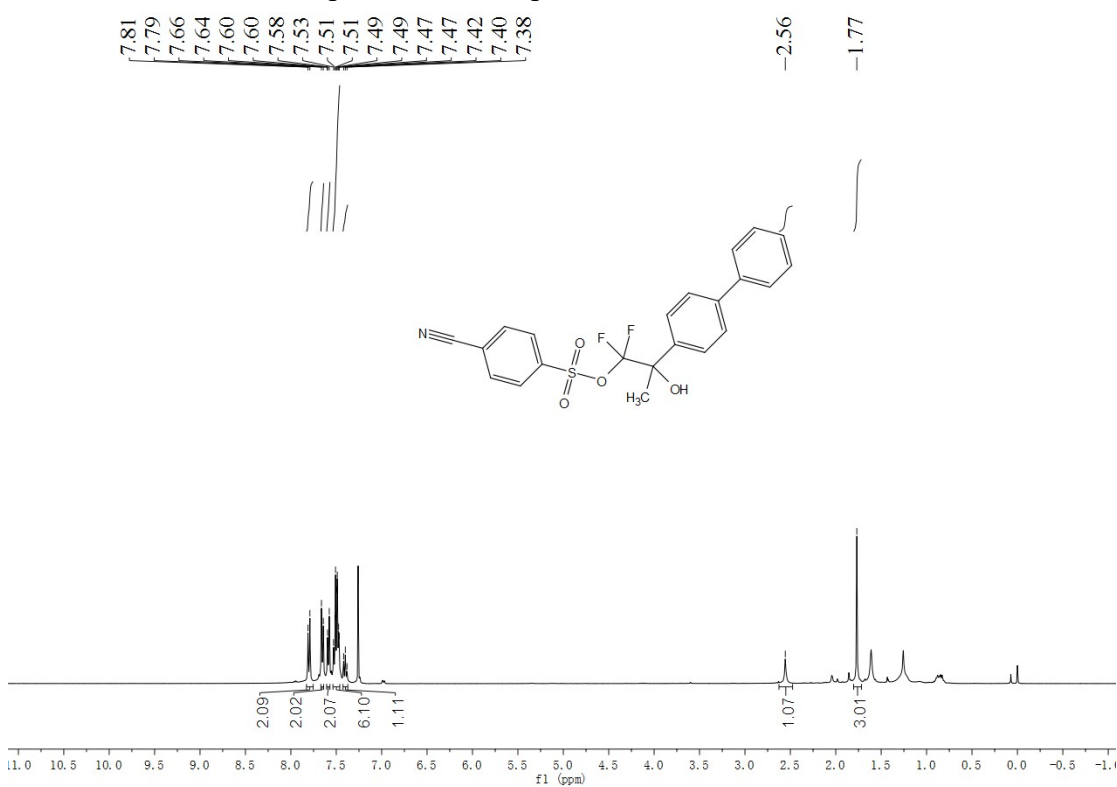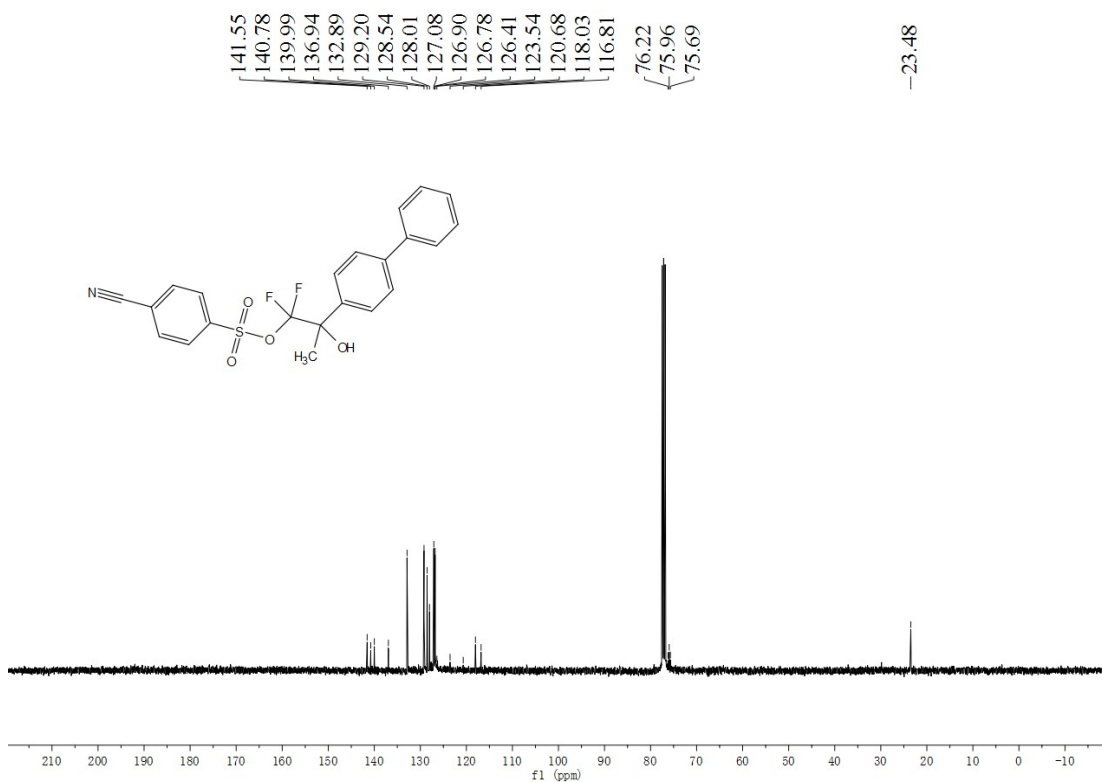

<sup>1</sup>H NMR and <sup>13</sup>C NMR spectrum of compound **3n**

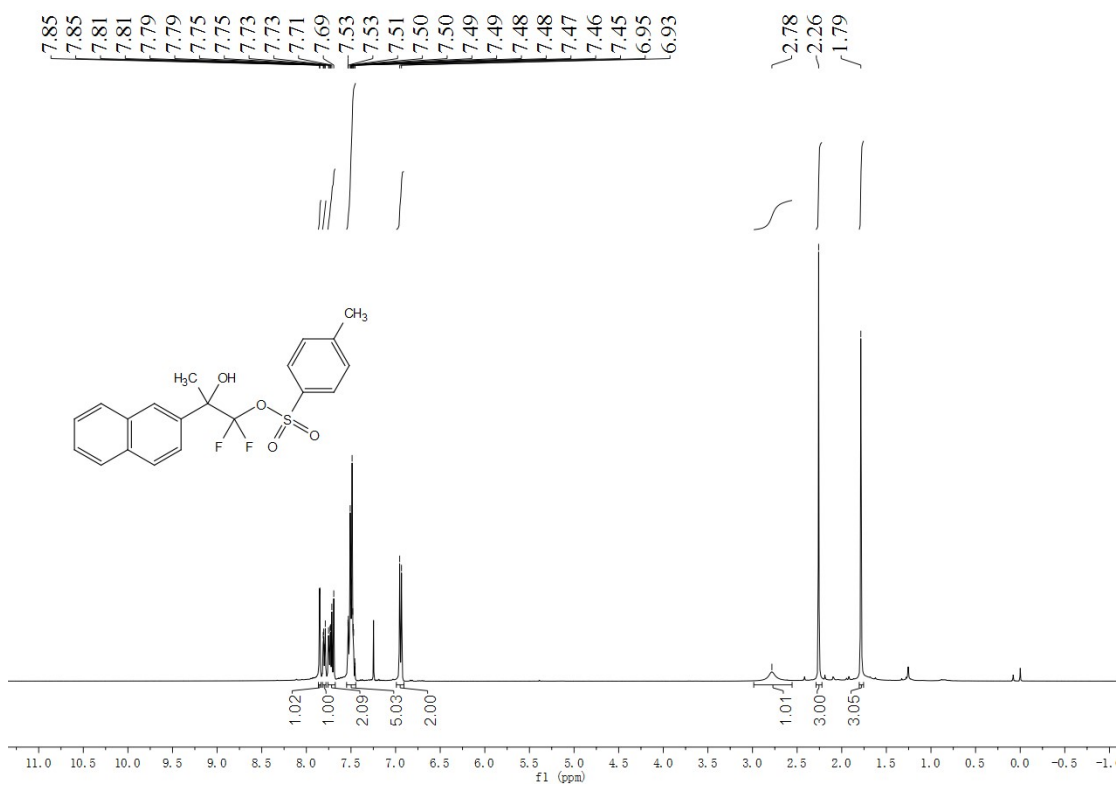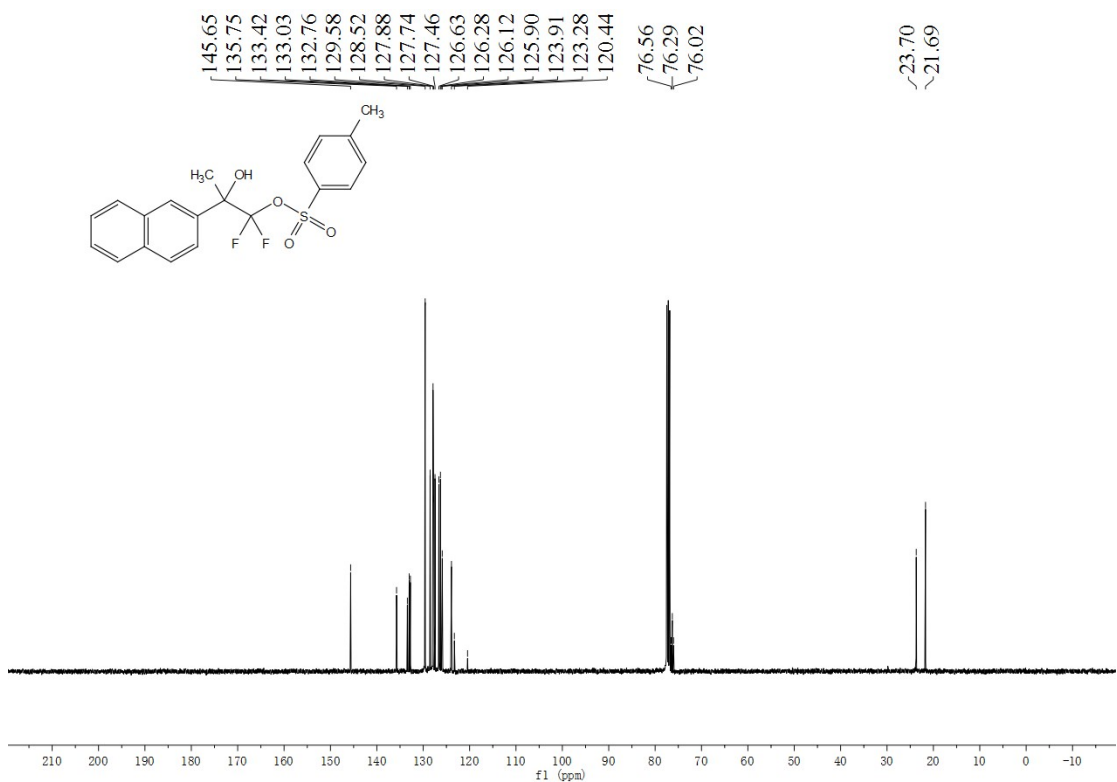

<sup>1</sup>H NMR and <sup>13</sup>C NMR spectrum of compound **30**

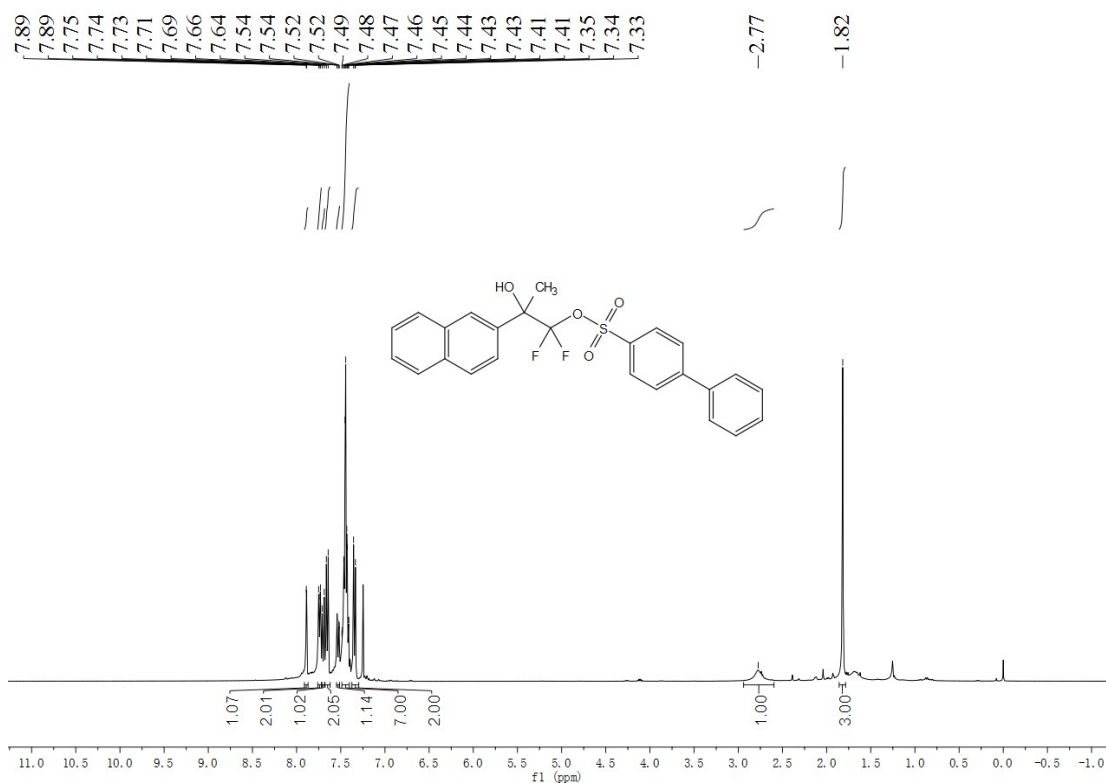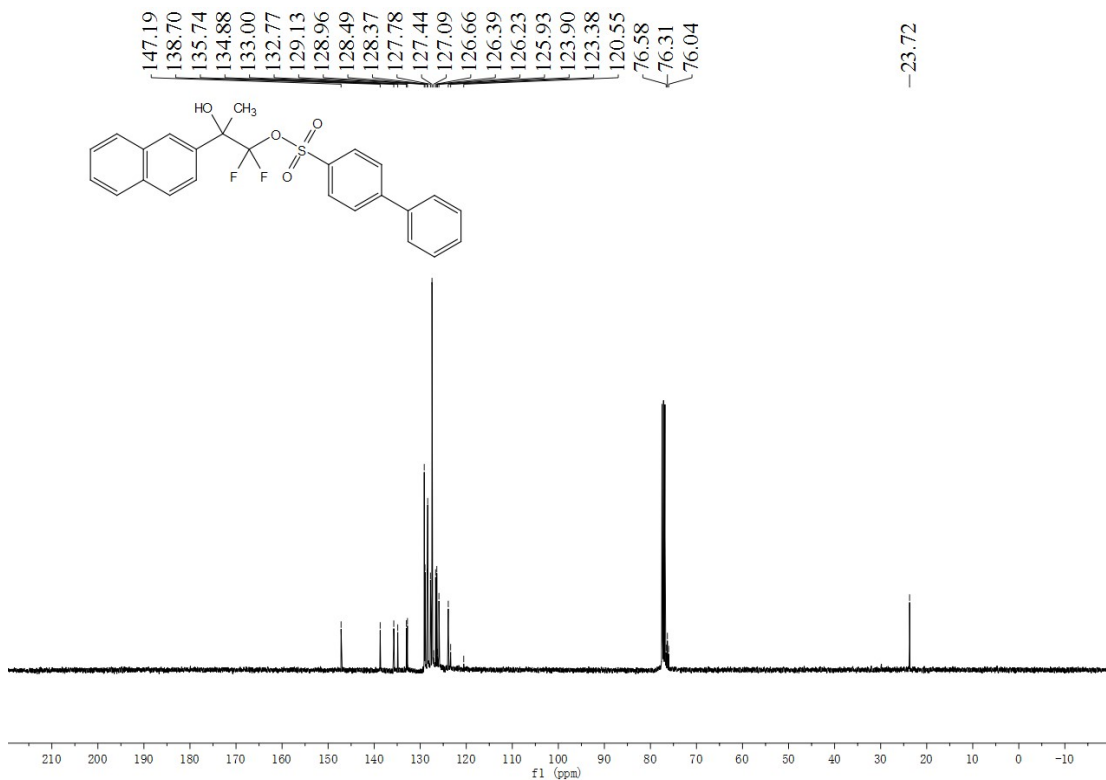

<sup>1</sup>H NMR and <sup>13</sup>C NMR spectrum of compound **3p**

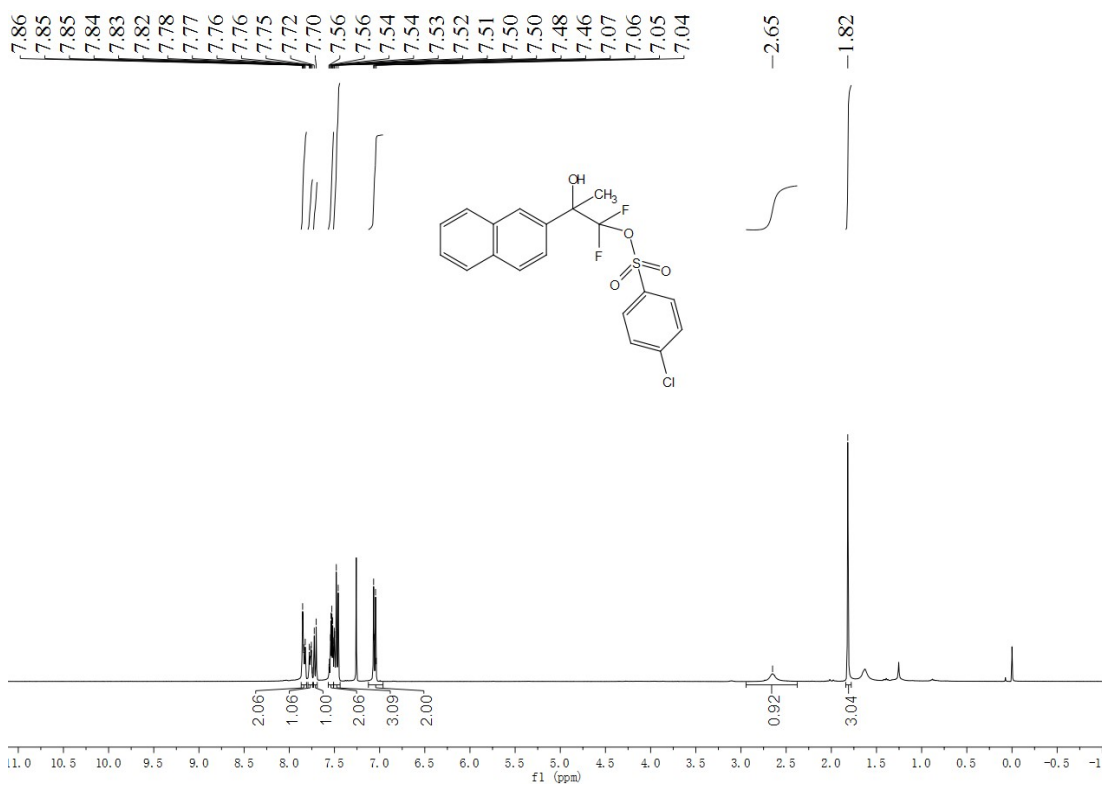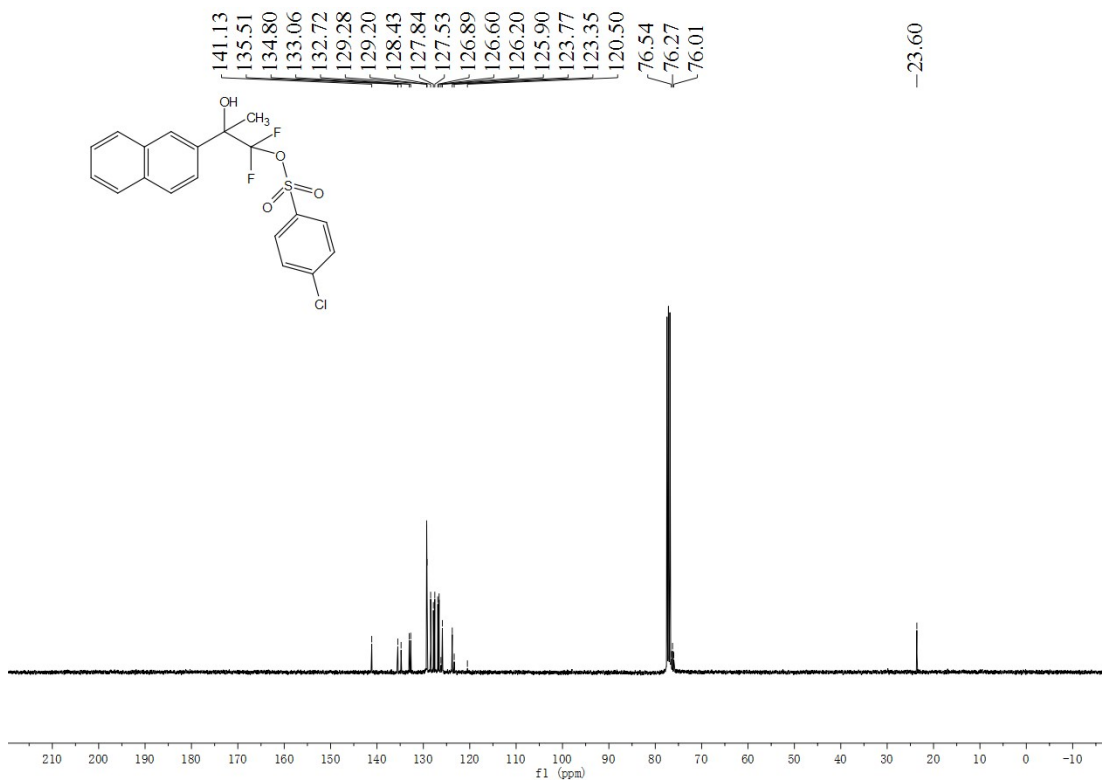

$^1\text{H}$  NMR and  $^{13}\text{C}$  NMR spectrum of compound **5a**

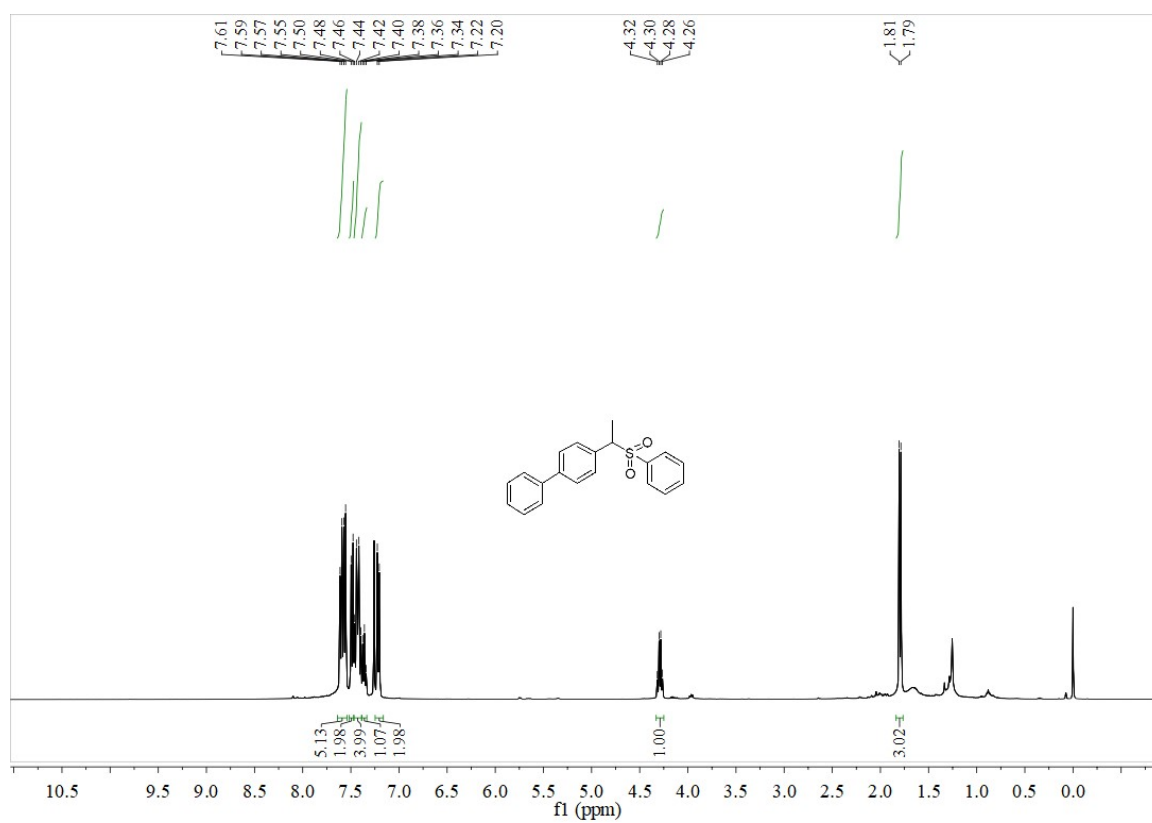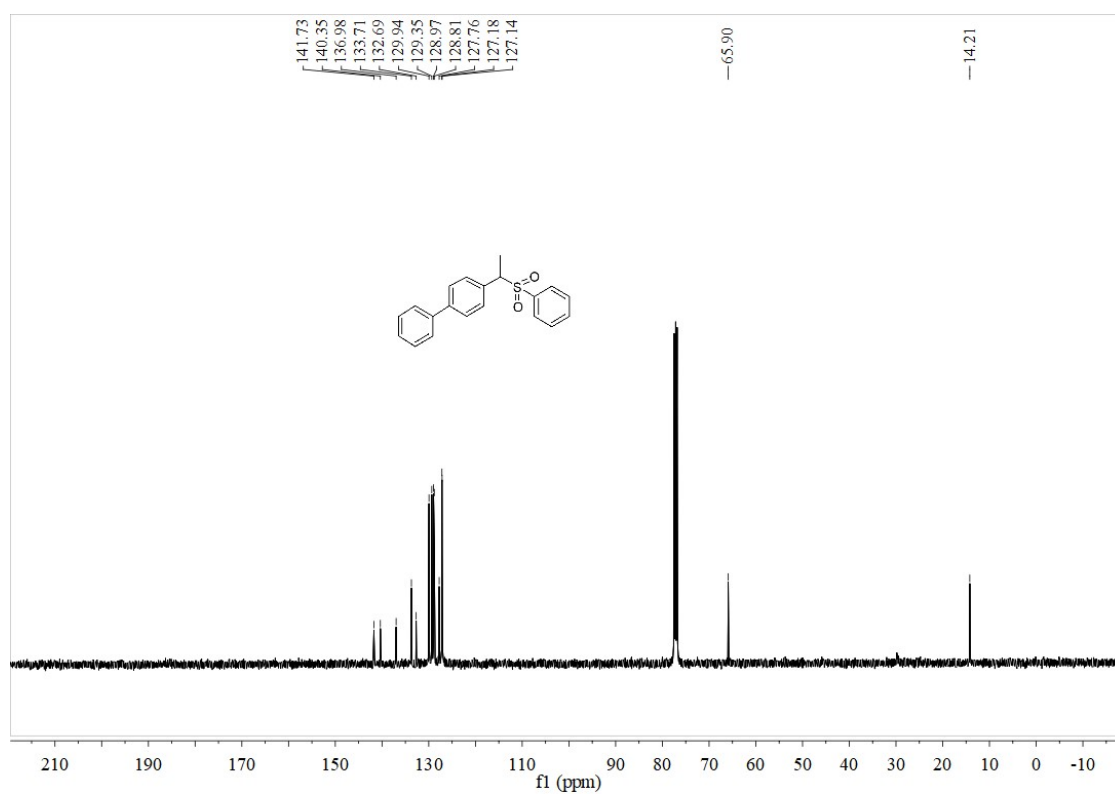

<sup>1</sup>H NMR and <sup>13</sup>C NMR spectrum of compound **5b**

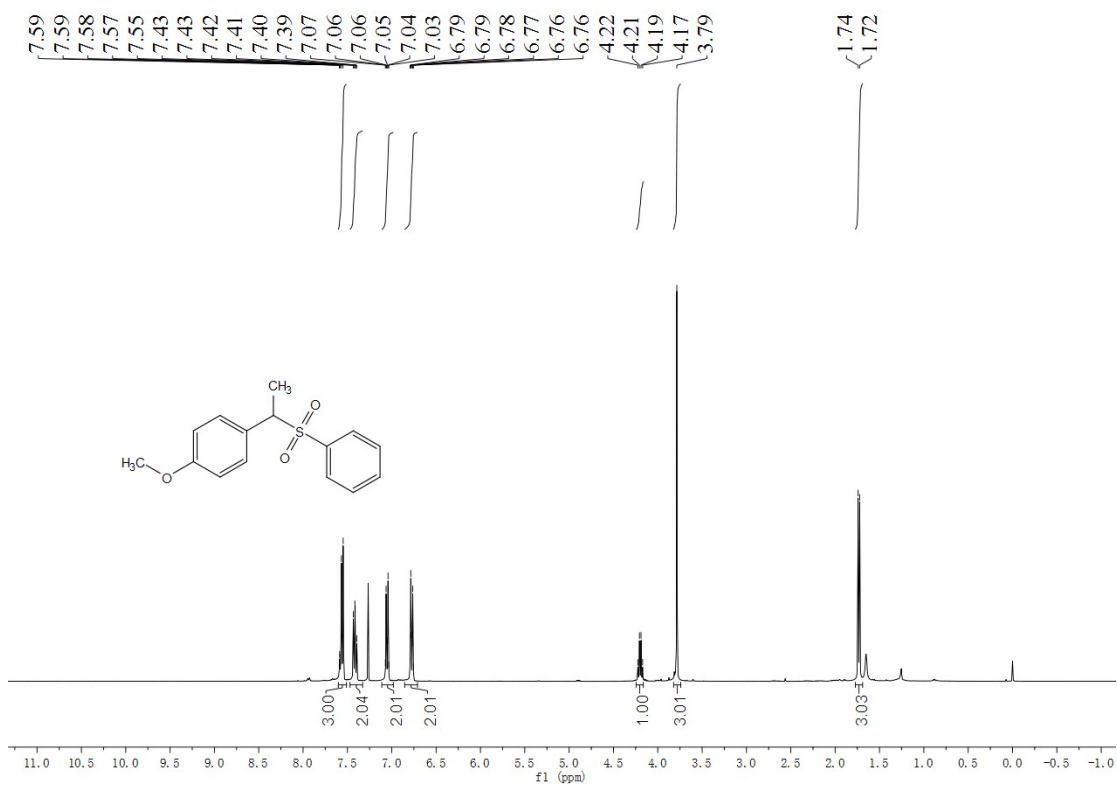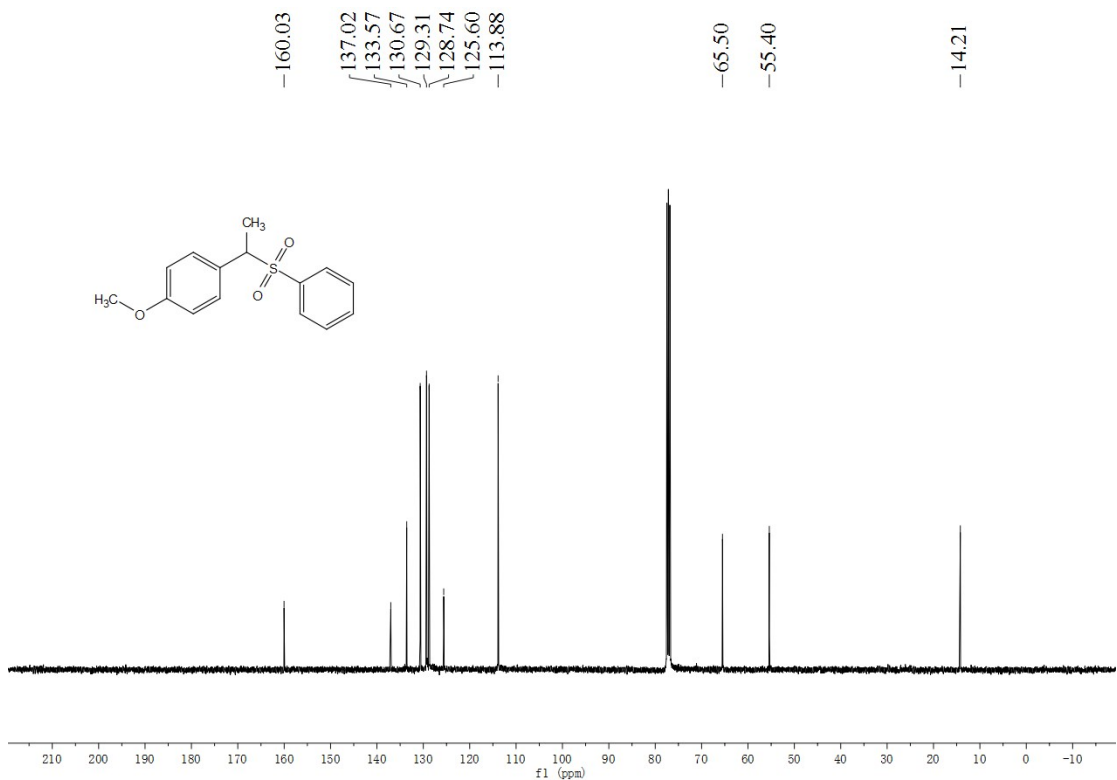

<sup>1</sup>H NMR and <sup>13</sup>C NMR spectrum of compound **5c**

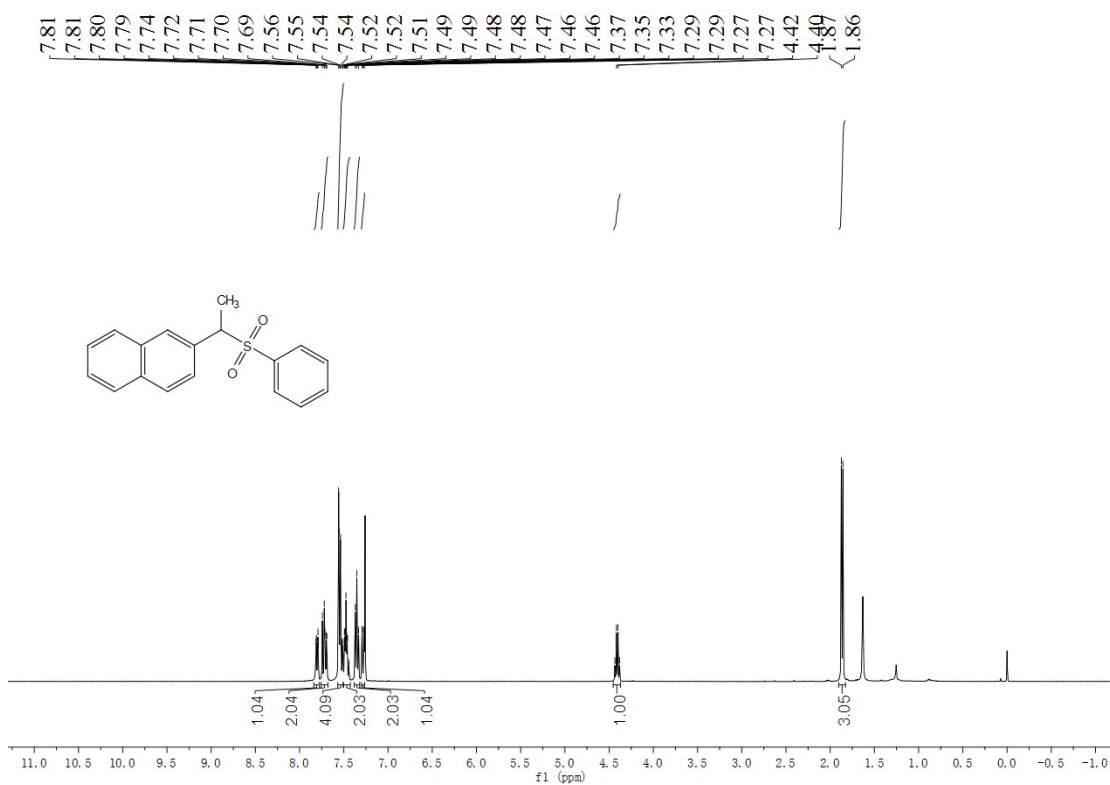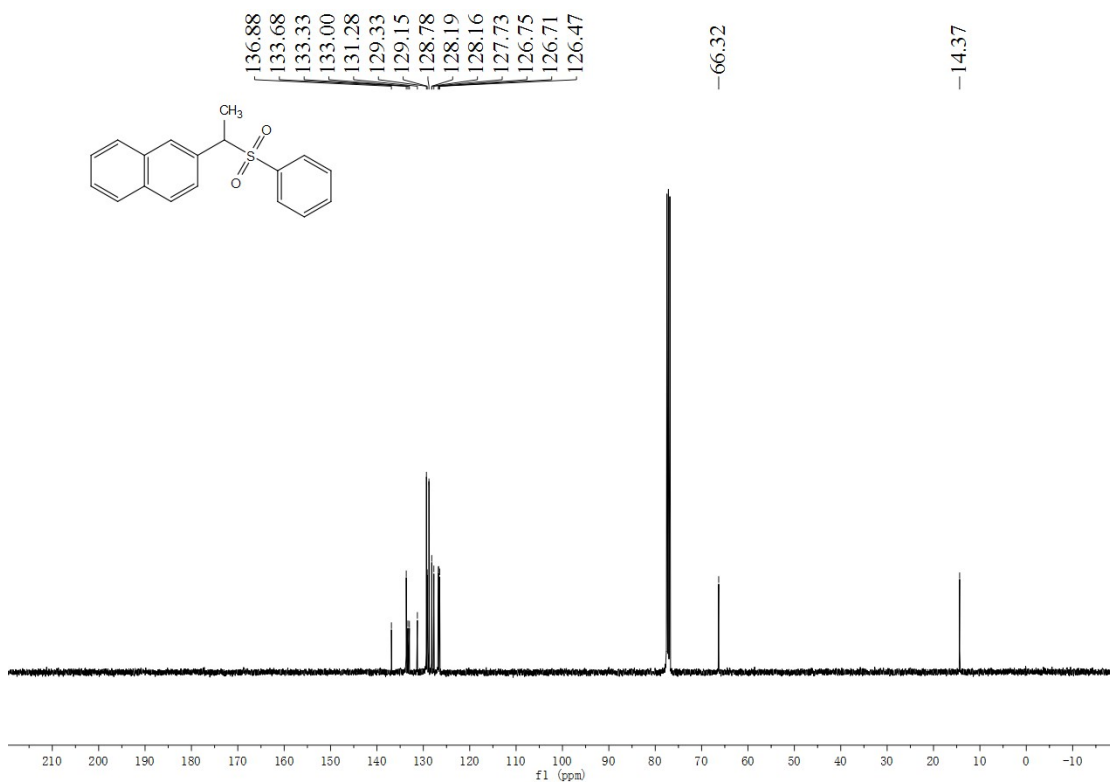



# <sup>1</sup>H NMR and <sup>13</sup>C NMR spectrum of compound 5d

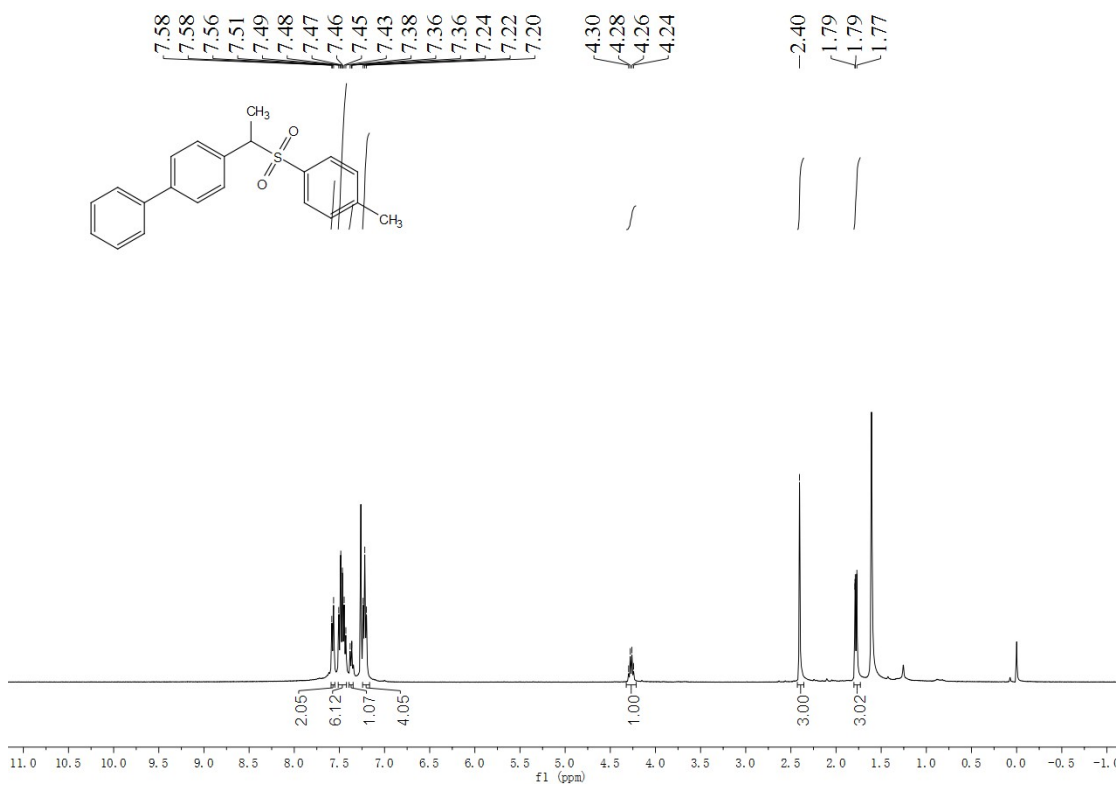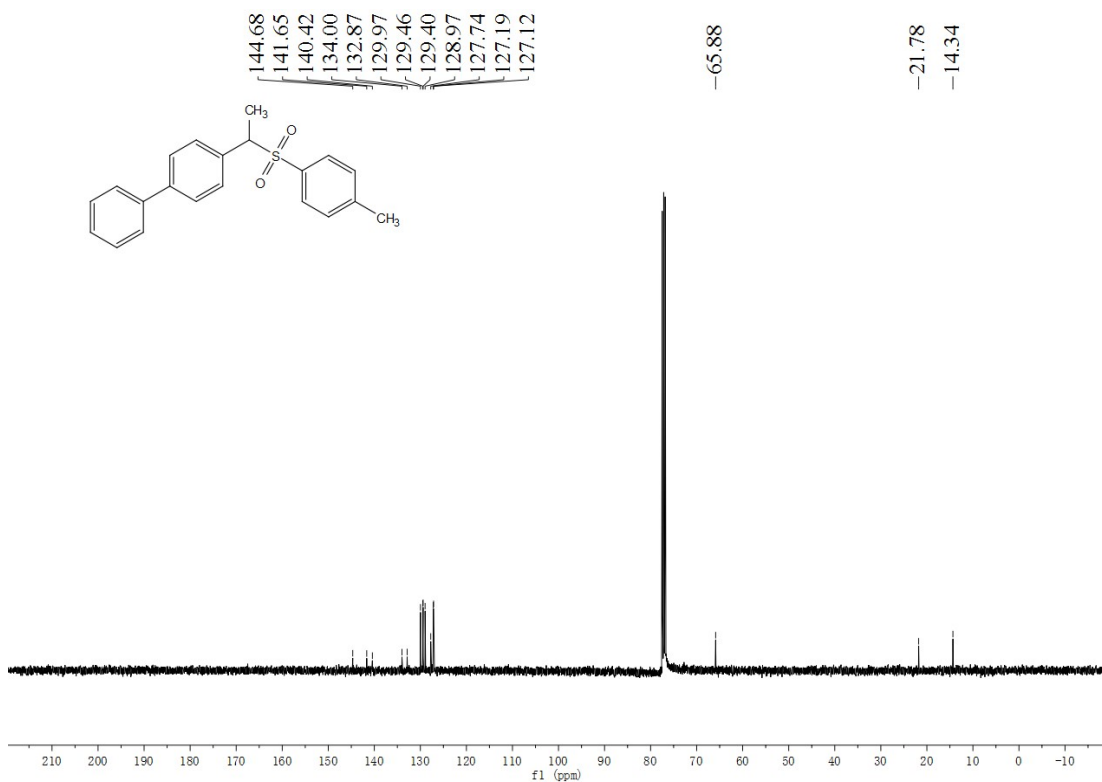

<sup>1</sup>H NMR and <sup>13</sup>C NMR spectrum of compound **5e**

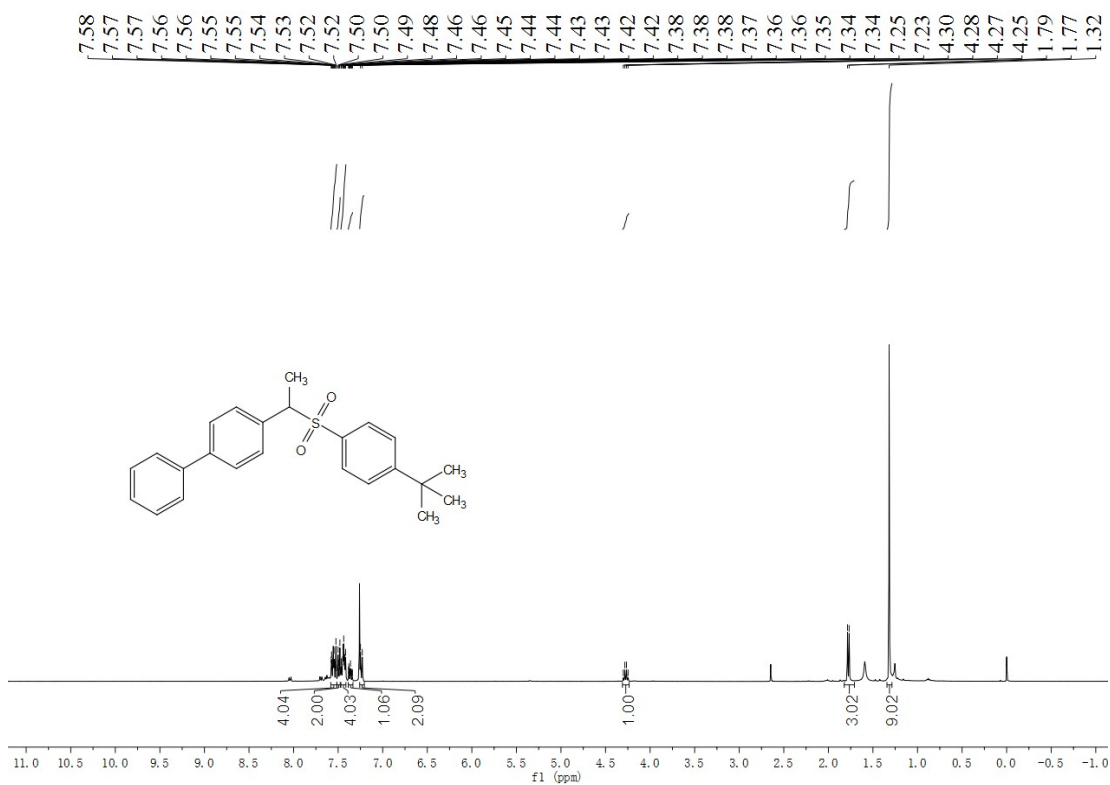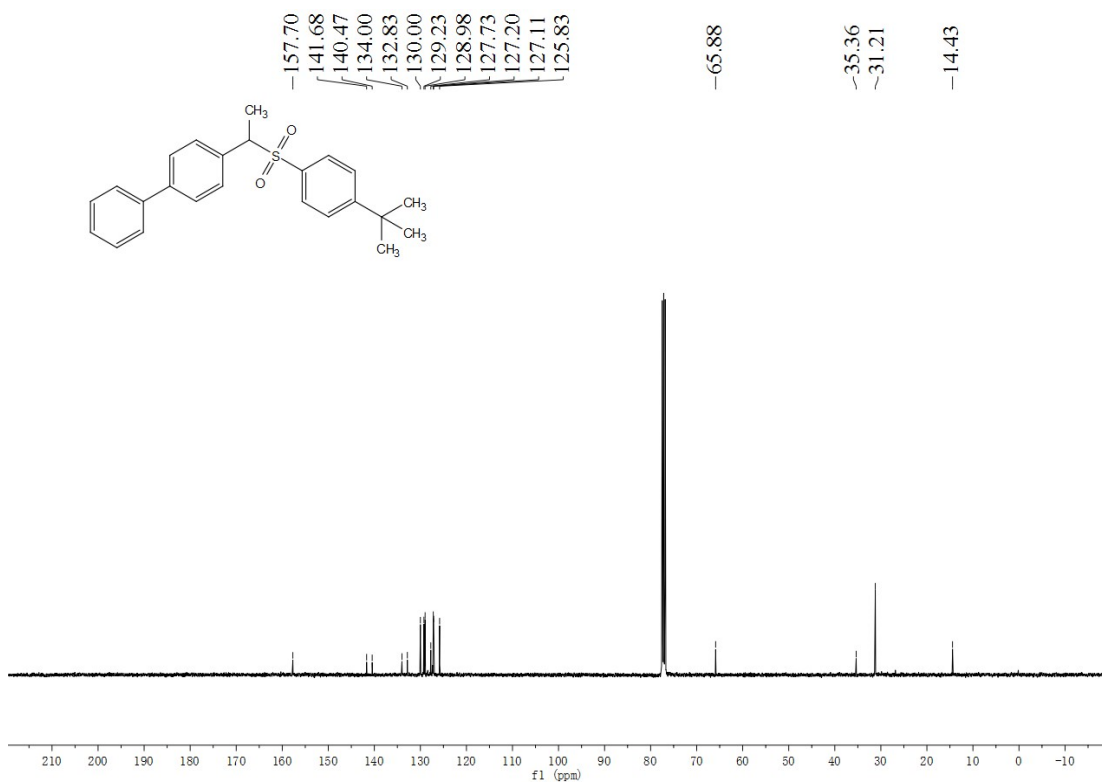

<sup>1</sup>H NMR and <sup>13</sup>C NMR spectrum of compound **5f**

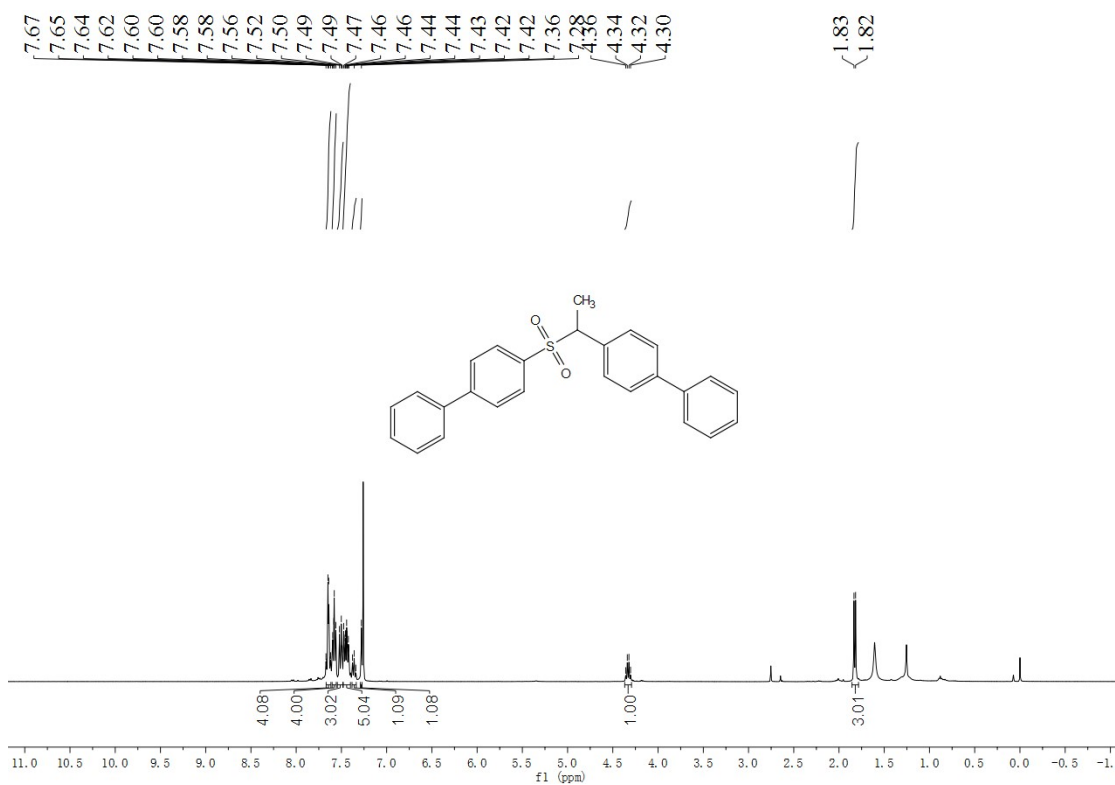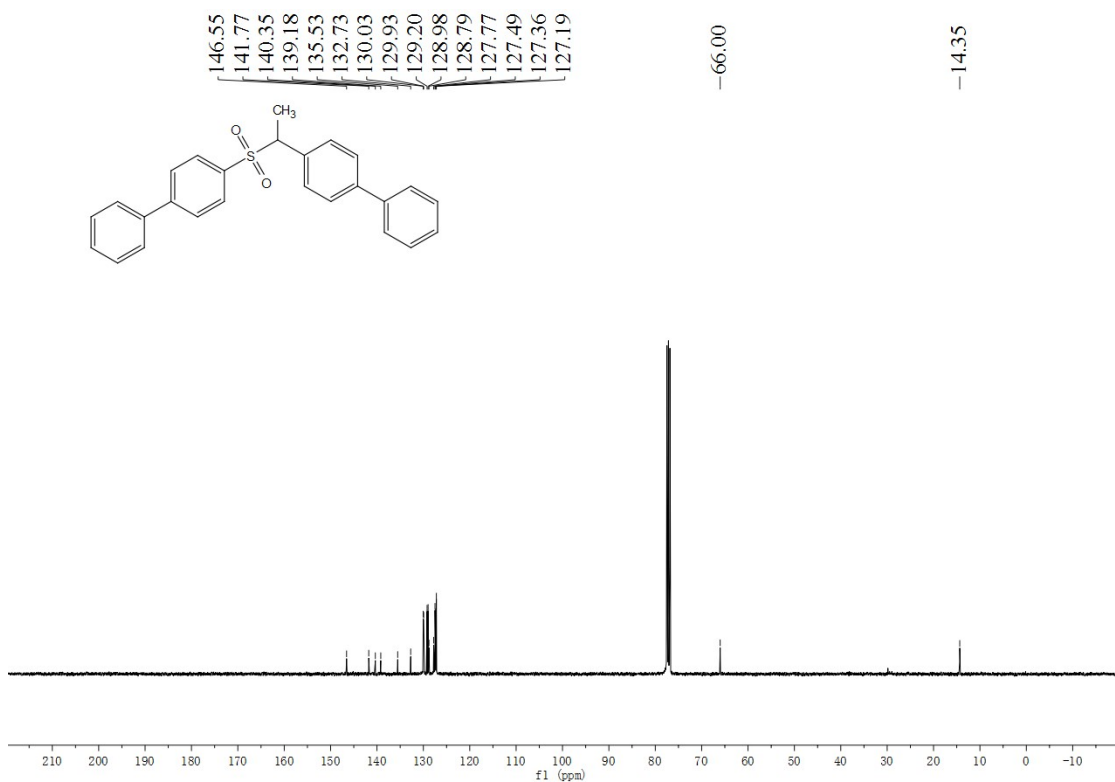

<sup>1</sup>H NMR and <sup>13</sup>C NMR spectrum of compound **5g**

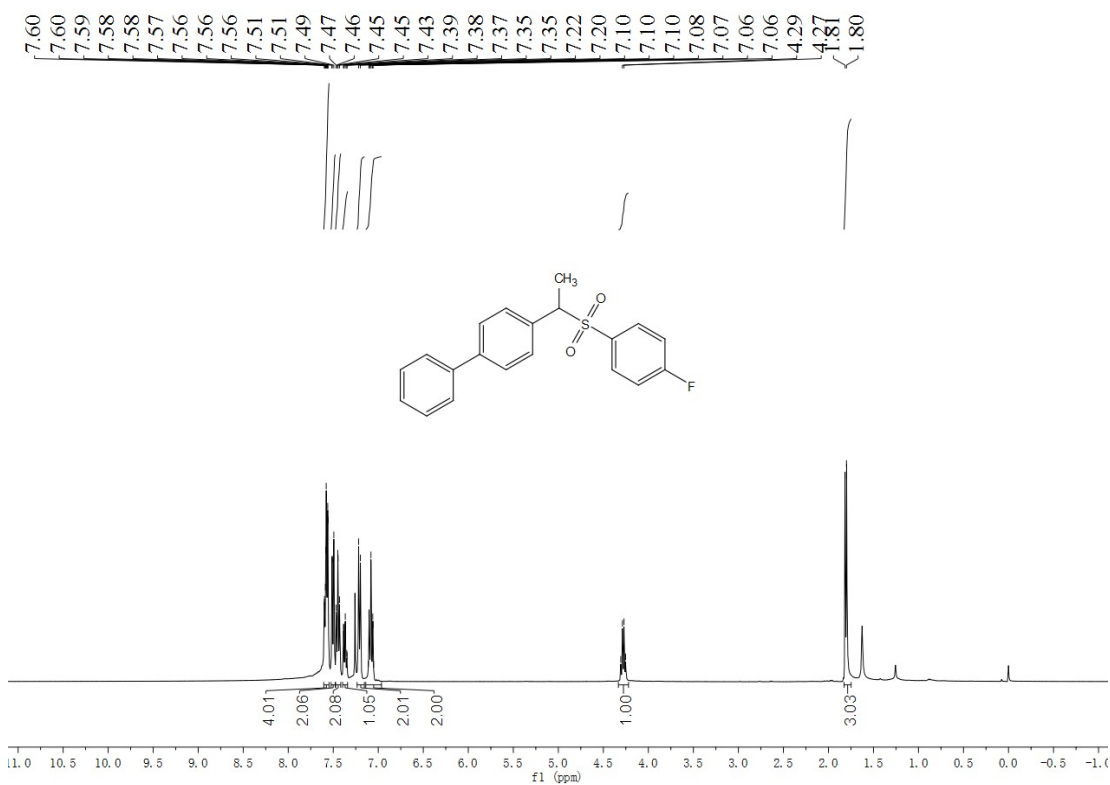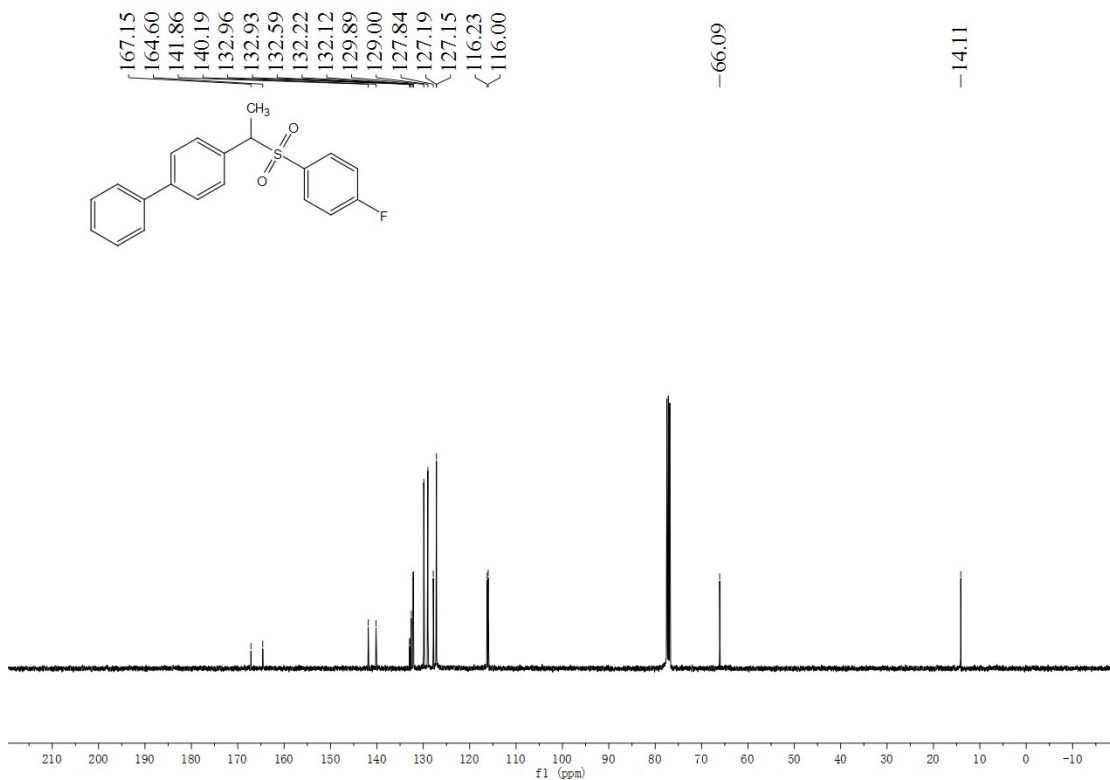

<sup>1</sup>H NMR and <sup>13</sup>C NMR spectrum of compound **5h**

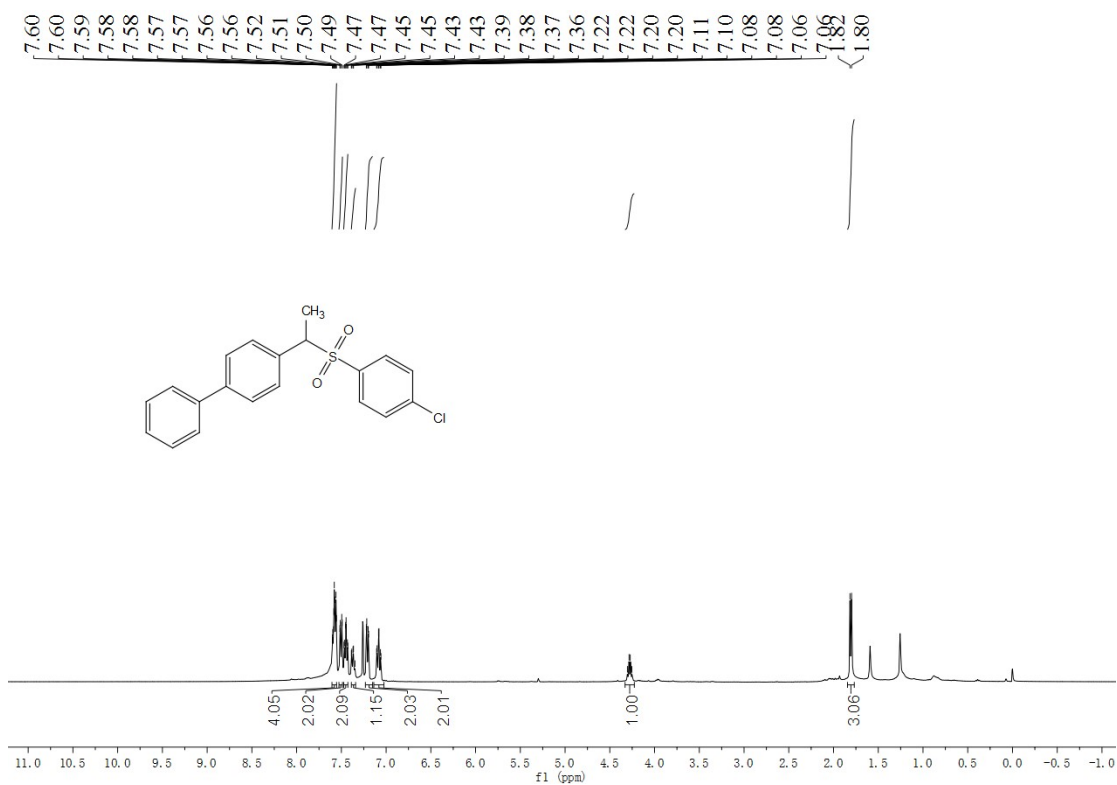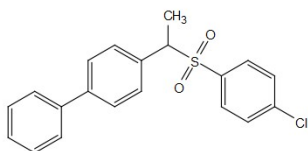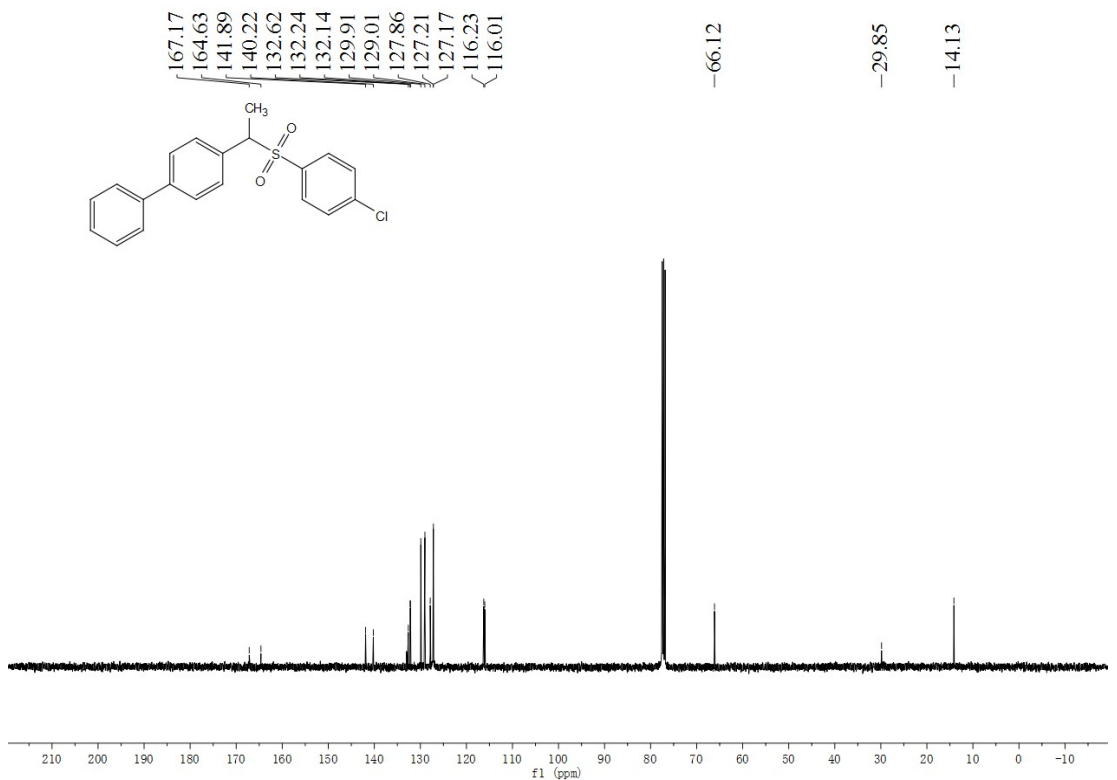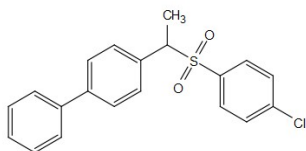

<sup>1</sup>H NMR and <sup>13</sup>C NMR spectrum of compound **5i**

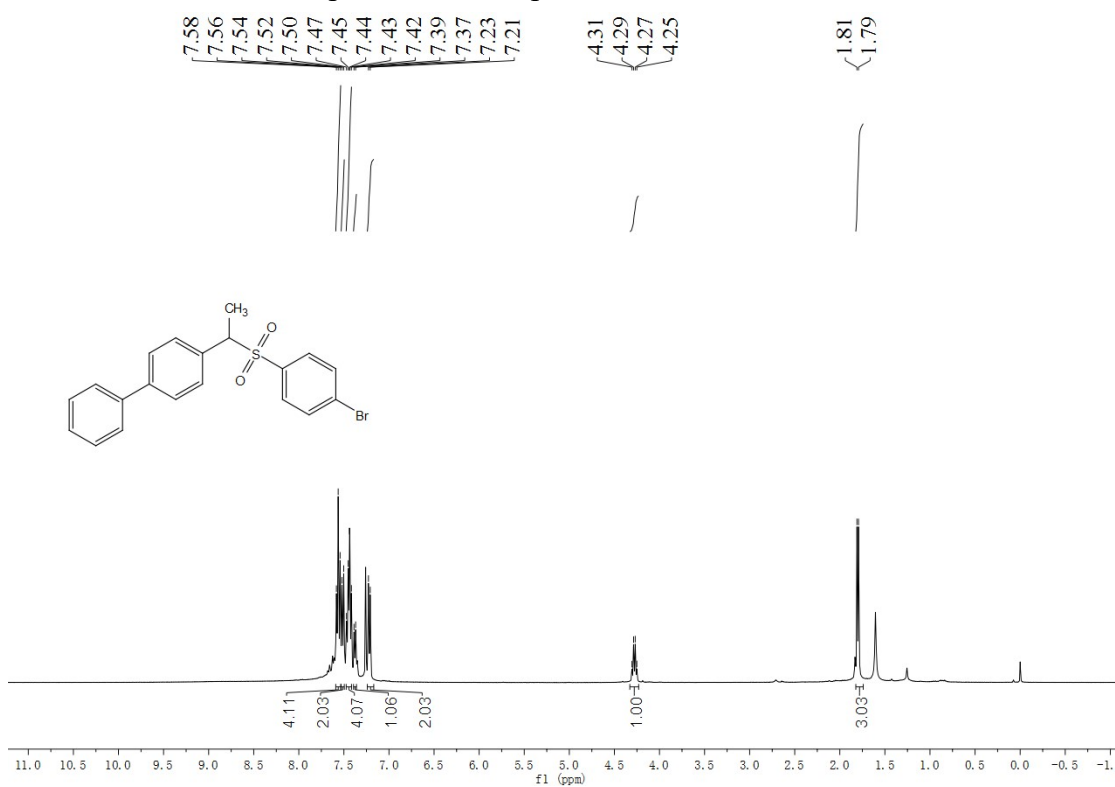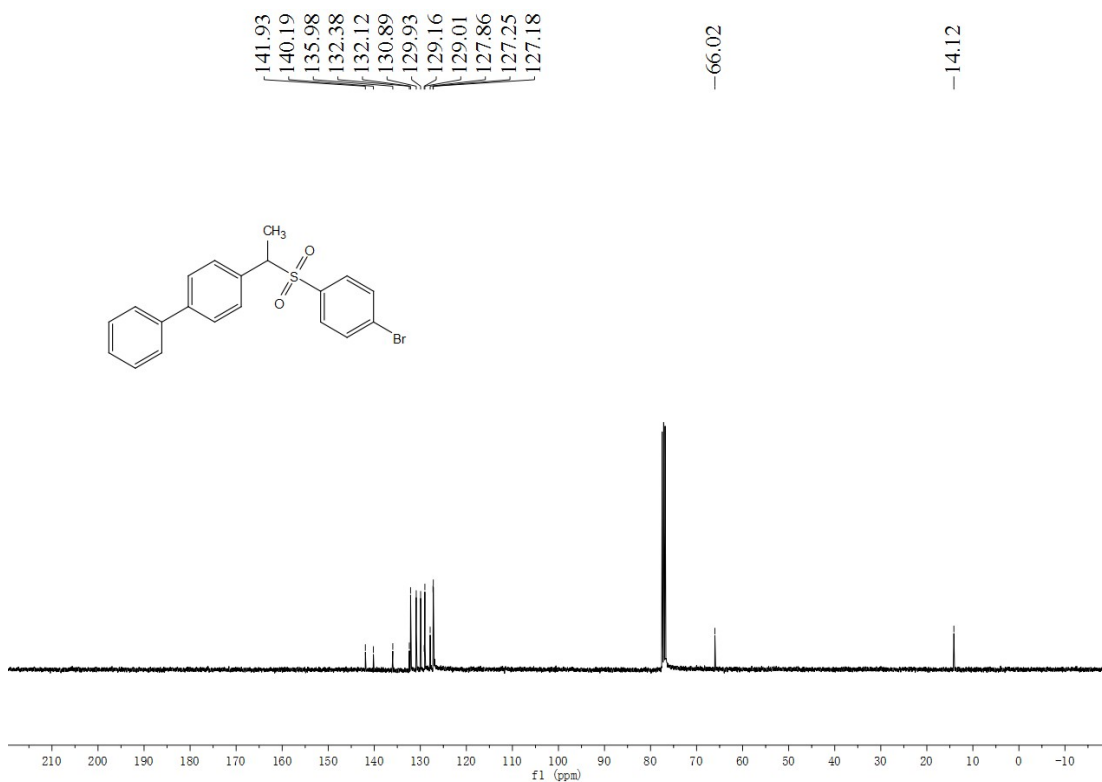

<sup>1</sup>H NMR and <sup>13</sup>C NMR spectrum of compound **5j**

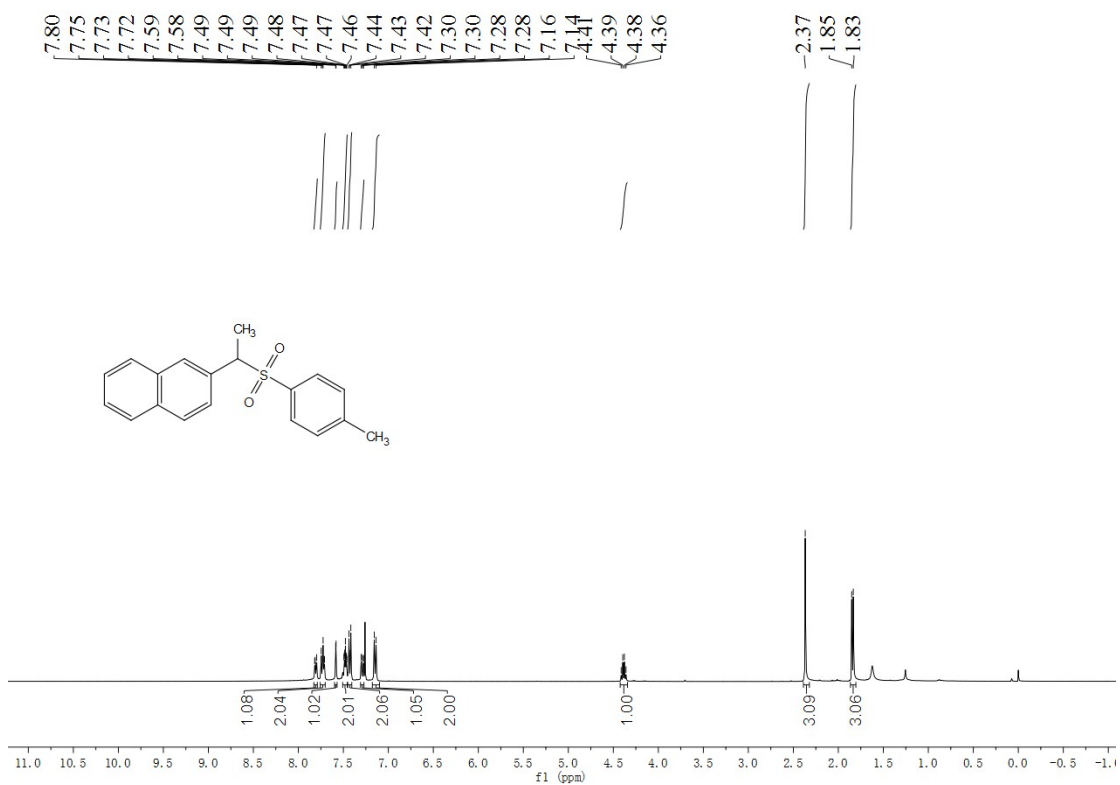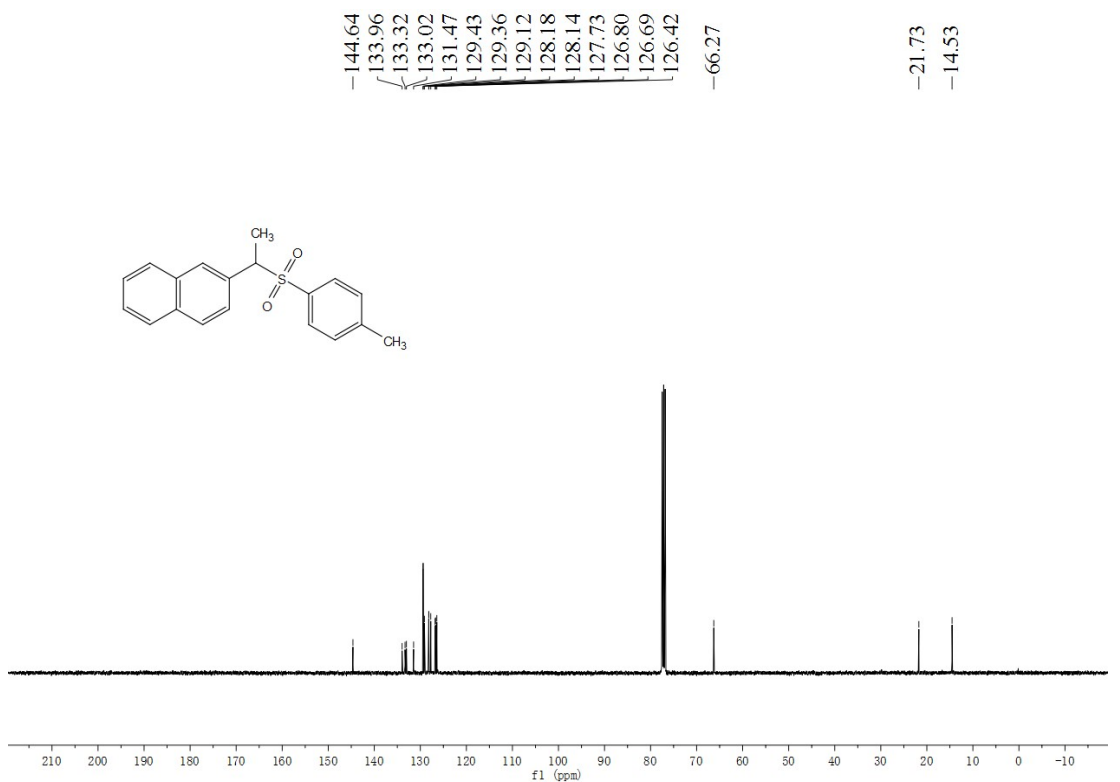

<sup>1</sup>H NMR and <sup>13</sup>C NMR spectrum of compound **5k**

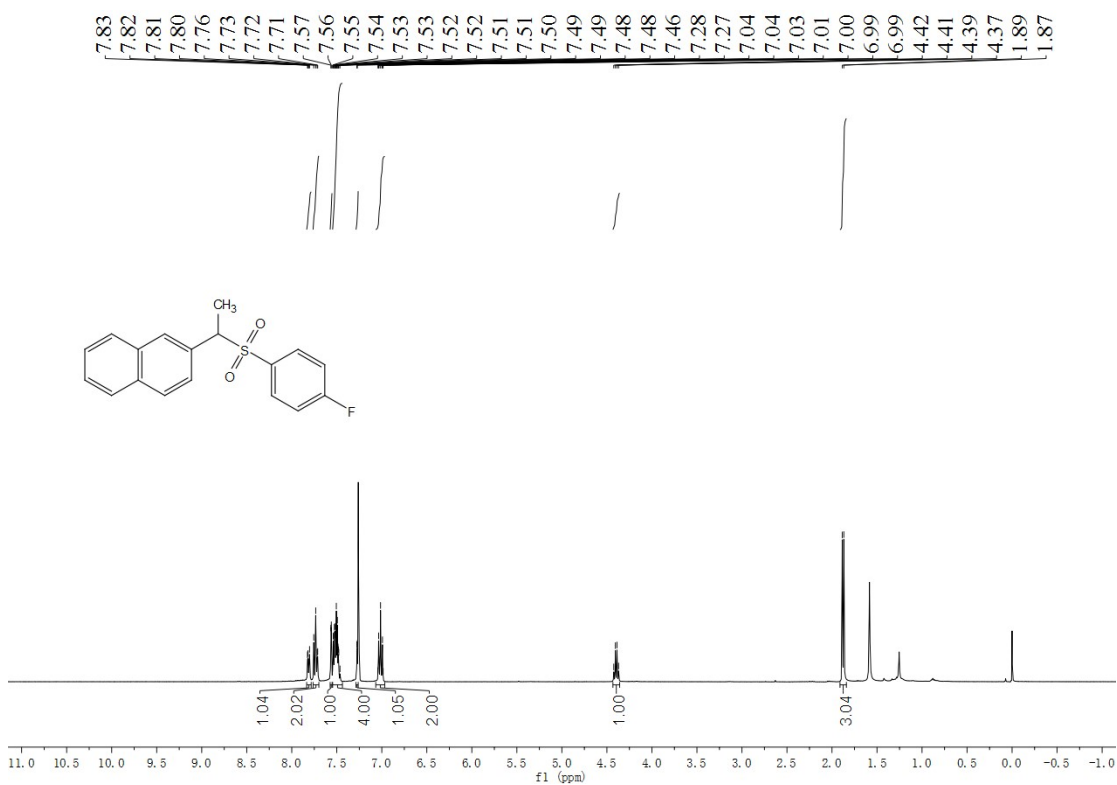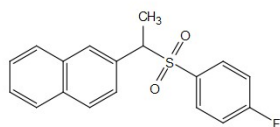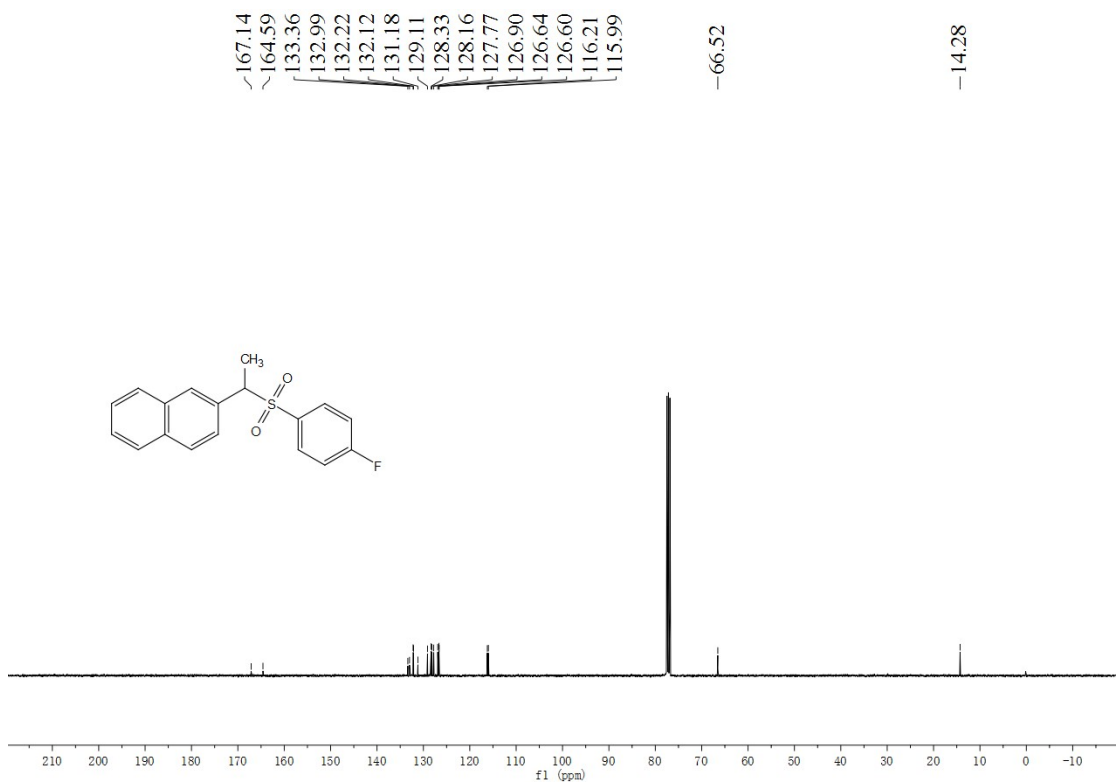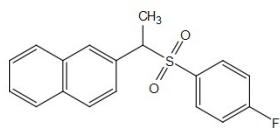



<sup>1</sup>H NMR and <sup>13</sup>C NMR spectrum of compound **51**

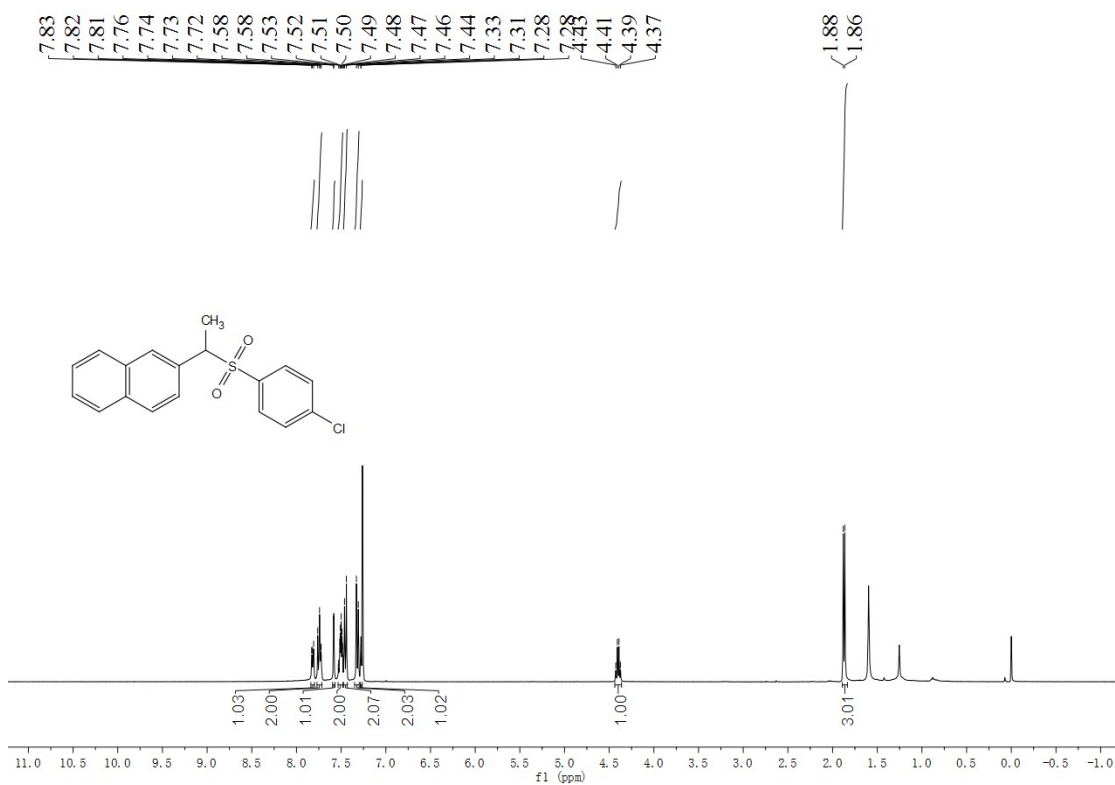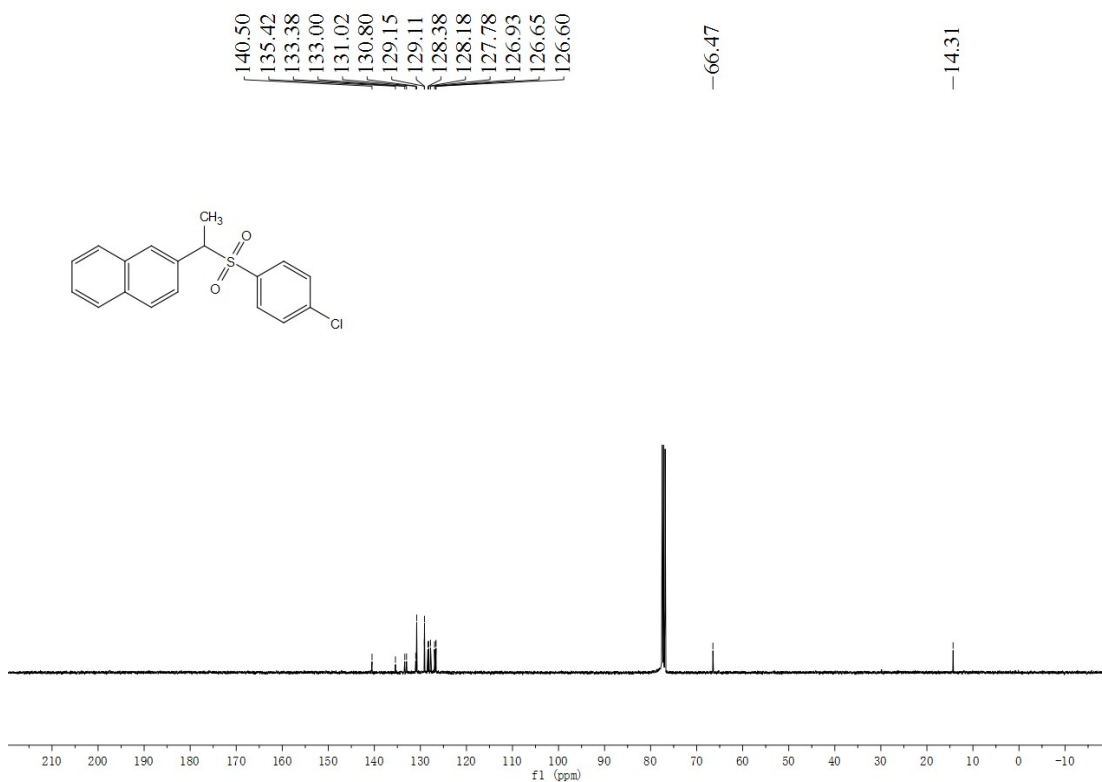

<sup>1</sup>H NMR and <sup>13</sup>C NMR spectrum of compound 6

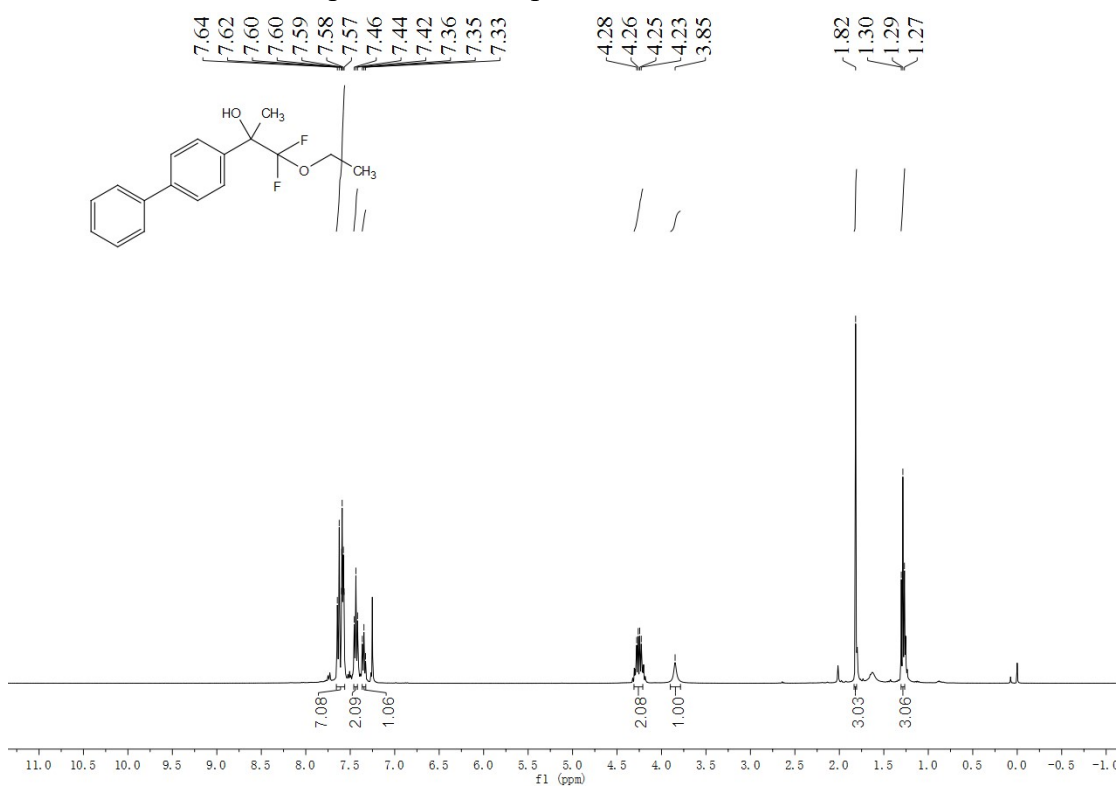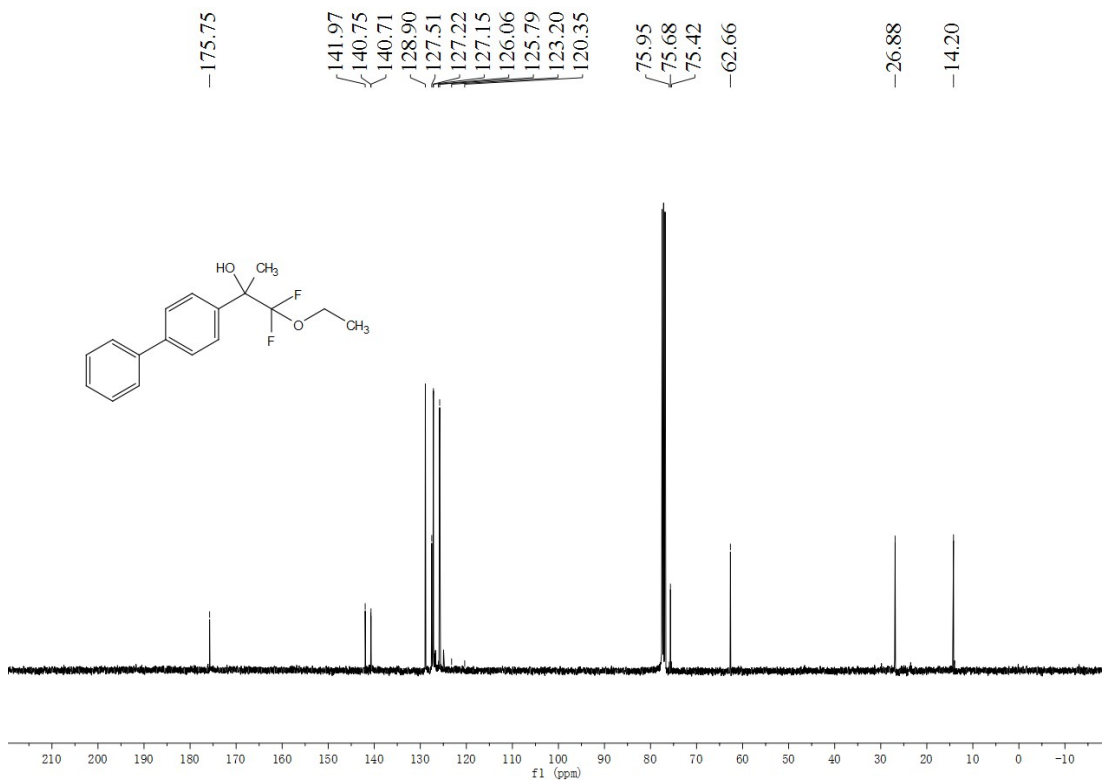

## 5. X-ray crystallographic data

Figure S1 X-ray single crystal structure of **3a**

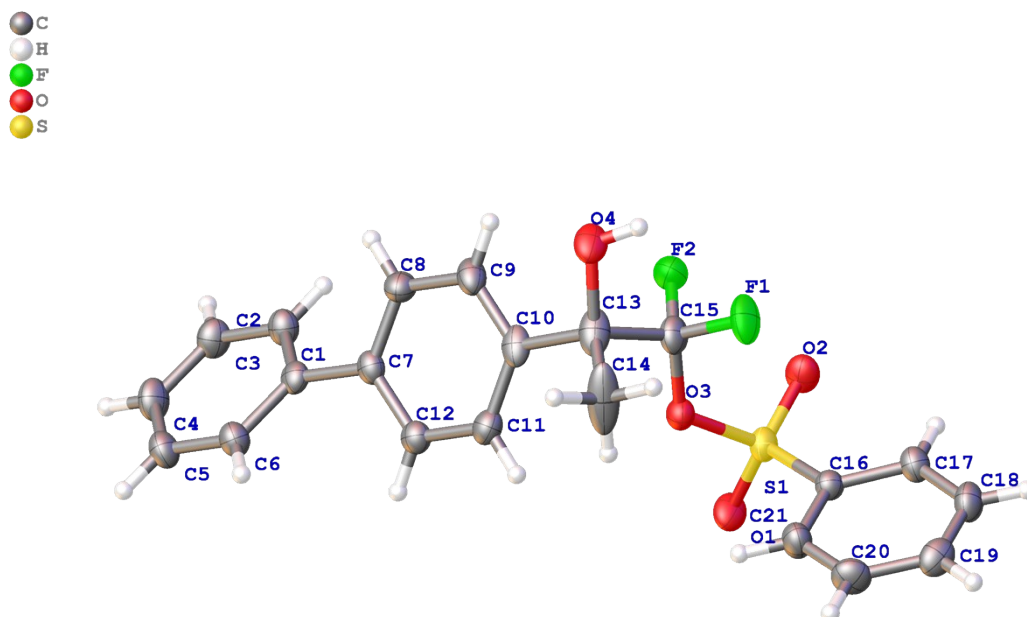

Single crystals of **3a** were grown by slow evaporation of its DCM/PE solution. Single-crystal X-ray diffraction data were collected with a 'multiwire proportional' diffractometer. The crystal was kept at 100 K during data collection. Using Olex2, the structure was solved with the olex2.solve structure solution program using Charge Flipping and refined with the olex2.refine refinement package using Least Squares minimization. Supplementary crystallographic data have been deposited at the Cambridge Crystallographic Data Center (CCDC 2094381).

**Table S2 Crystal data and structure refinement for 3a.**

|                                      |                                                                 |
|--------------------------------------|-----------------------------------------------------------------|
| Identification code                  | 3a                                                              |
| Empirical formula                    | C <sub>21</sub> H <sub>18</sub> F <sub>2</sub> O <sub>4</sub> S |
| Formula weight                       | 404.41                                                          |
| Temperature/K                        | 149.99(10)                                                      |
| Crystal system                       | monoclinic                                                      |
| Space group                          | P2 <sub>1</sub> /c                                              |
| a/Å                                  | 6.0267(3)                                                       |
| b/Å                                  | 18.6496(7)                                                      |
| c/Å                                  | 16.3446(7)                                                      |
| α/°                                  | 90                                                              |
| β/°                                  | 96.788(4)                                                       |
| γ/°                                  | 90                                                              |
| Volume/Å <sup>3</sup>                | 1824.18(14)                                                     |
| Z                                    | 4                                                               |
| ρ <sub>calc</sub> /g/cm <sup>3</sup> | 1.473                                                           |
| μ/mm <sup>-1</sup>                   | 1.991                                                           |

**Table S2 Crystal data and structure refinement for 3a.**

|                                                  |                                                                      |
|--------------------------------------------------|----------------------------------------------------------------------|
| F(000)                                           | 840.0                                                                |
| Crystal size/mm <sup>3</sup>                     | 0.13 × 0.1 × 0.08                                                    |
| Radiation                                        | Cu K $\alpha$ ( $\lambda$ = 1.54184)                                 |
| 2 $\Theta$ range for data collection/ $^{\circ}$ | 7.22 to 133.146                                                      |
| Index ranges                                     | -7 $\leq$ h $\leq$ 4, -21 $\leq$ k $\leq$ 22, -19 $\leq$ l $\leq$ 19 |
| Reflections collected                            | 6693                                                                 |
| Independent reflections                          | 3223 [ $R_{\text{int}}$ = 0.0893, $R_{\text{sigma}}$ = 0.0929]       |
| Data/restraints/parameters                       | 3223/0/265                                                           |
| Goodness-of-fit on F <sup>2</sup>                | 1.050                                                                |
| Final R indexes [ $I \geq 2\sigma(I)$ ]          | $R_1$ = 0.0597, $wR_2$ = 0.1395                                      |
| Final R indexes [all data]                       | $R_1$ = 0.0789, $wR_2$ = 0.1566                                      |

**Table S3 Bond Lengths for 3a.**

| Atom | Atom | Length/ $\text{\AA}$ | Atom | Atom | Length/ $\text{\AA}$ |
|------|------|----------------------|------|------|----------------------|
| S1   | O1   | 1.424(2)             | C7   | C8   | 1.394(4)             |
| S1   | O2   | 1.419(2)             | C7   | C12  | 1.392(5)             |
| S1   | O3   | 1.621(2)             | C8   | C9   | 1.389(5)             |
| S1   | C16  | 1.750(3)             | C9   | C10  | 1.381(5)             |
| F1   | C15  | 1.361(4)             | C10  | C11  | 1.397(5)             |
| F2   | C15  | 1.343(4)             | C10  | C13  | 1.528(5)             |
| O3   | C15  | 1.395(4)             | C11  | C12  | 1.391(5)             |
| O4   | C13  | 1.473(6)             | C13  | C14  | 1.505(6)             |
| O5   | C13  | 1.38(2)              | C13  | C15  | 1.536(5)             |
| C1   | C2   | 1.390(5)             | C16  | C17  | 1.387(4)             |
| C1   | C6   | 1.390(5)             | C16  | C21  | 1.380(5)             |
| C1   | C7   | 1.485(4)             | C17  | C18  | 1.381(5)             |
| C2   | C3   | 1.391(5)             | C18  | C19  | 1.382(5)             |
| C3   | C4   | 1.381(5)             | C19  | C20  | 1.384(5)             |
| C4   | C5   | 1.386(5)             | C20  | C21  | 1.386(5)             |
| C5   | C6   | 1.389(5)             |      |      |                      |

**Table S4 Bond Angles for 3a.**

| Atom | Atom | Atom | Angle/ $^{\circ}$ | Atom | Atom | Atom | Angle/ $^{\circ}$ |
|------|------|------|-------------------|------|------|------|-------------------|
| O1   | S1   | O3   | 101.39(14)        | C11  | C12  | C7   | 120.8(3)          |
| O1   | S1   | C16  | 110.07(16)        | O4   | C13  | C10  | 106.3(3)          |
| O2   | S1   | O1   | 120.57(16)        | O4   | C13  | C14  | 116.0(5)          |
| O2   | S1   | O3   | 109.81(14)        | O4   | C13  | C15  | 104.2(4)          |
| O2   | S1   | C16  | 110.18(15)        | O5   | C13  | C10  | 120.1(12)         |

**Table S4 Bond Angles for 3a.**

| <b>Atom Atom Atom</b> | <b>Angle/°</b> | <b>Atom Atom Atom</b> | <b>Angle/°</b> |
|-----------------------|----------------|-----------------------|----------------|
| O3 S1 C16             | 103.10(14)     | O5 C13 C14            | 81(2)          |
| C15 O3 S1             | 123.4(2)       | O5 C13 C15            | 121.5(12)      |
| C2 C1 C6              | 118.2(3)       | C10 C13 C15           | 109.1(3)       |
| C2 C1 C7              | 120.8(3)       | C14 C13 C10           | 112.2(4)       |
| C6 C1 C7              | 120.9(3)       | C14 C13 C15           | 108.6(3)       |
| C1 C2 C3              | 120.9(3)       | F1 C15 O3             | 109.7(3)       |
| C4 C3 C2              | 120.4(3)       | F1 C15 C13            | 111.0(3)       |
| C3 C4 C5              | 119.1(3)       | F2 C15 F1             | 105.4(3)       |
| C4 C5 C6              | 120.5(3)       | F2 C15 O3             | 110.1(3)       |
| C5 C6 C1              | 120.8(3)       | F2 C15 C13            | 110.3(3)       |
| C8 C7 C1              | 120.4(3)       | O3 C15 C13            | 110.3(3)       |
| C12 C7 C1             | 121.4(3)       | C17 C16 S1            | 118.7(3)       |
| C12 C7 C8             | 118.2(3)       | C21 C16 S1            | 119.8(3)       |
| C9 C8 C7              | 120.9(3)       | C21 C16 C17           | 121.4(3)       |
| C10 C9 C8             | 121.0(3)       | C18 C17 C16           | 119.2(3)       |
| C9 C10 C11            | 118.5(3)       | C17 C18 C19           | 119.8(3)       |
| C9 C10 C13            | 119.4(3)       | C18 C19 C20           | 120.7(3)       |
| C11 C10 C13           | 122.1(3)       | C19 C20 C21           | 119.9(3)       |
| C12 C11 C10           | 120.6(3)       | C16 C21 C20           | 118.9(3)       |

## 6. References

1. Tian, H.; Shimakoshi, H.; Imamura, K.; Shiota, Y.; Yoshizawa, K.; Hisaeda, Y. *Chem. Commun.* **2017**, *53*, 9478.
2. Sakaguchi, H.; Uetake, Y.; Ohashi, M.; Niwa, T.; Ogoshi, S.; Hosoya, T. *J. Am. Chem. Soc.* **2017**, *139*, 12855.
3. Zhang, Z.; Yu, W.; Wu, C.; Wang, C.; Zhang, Y.; Wang, J. *Angew. Chem. Int. Ed.* **2016**, *55*, 273.
4. Zhao, Y.; Huang, W.; Zhu, L.; Hu, J. *Org. Lett.* **2010**, *12*, 1444.
5. Liu, X.; Lin, E. E.; Chen, G.; Li, J.-L.; Liu, P.; Wang, H. *Org. Lett.* **2019**, *21*, 8454.
6. Zheng, J.; Cai, J.; Lin, J.-H.; Guo, Y.; Xiao, J.-C. *Chem. Commun.* **2013**, *49*, 7513.
